1 **Research Paper**

2

3 **Nitric oxide synthase-mediated early nitric oxide-burst alleviates**  
4 **drought-induced oxidative damage in ammonium supplied-rice roots**

5

6 **Running title: Early nitric oxide burst in drought tolerance**

7

8 Cao Xiaochuang<sup>¶1</sup>, E-mail: caoxiaochuang@126.com

9 Zhu Chunquan<sup>¶1</sup>, E-mail:situyajie@126.com

10 Zhong Chu<sup>¶</sup>, E-mail:1035305743@qq.com

11 Zhang Junhua<sup>1</sup>, E-mail:Jhzhang316@gmail.com

12 Zhu Lianfeng<sup>1</sup>, E-mail:zlfnj@163.com

13 Wu Lianghuan, E-mail:21014105@zju.edu.cn

14 Ma Qingxu<sup>\*2</sup>, E-mail:592214410@qq.com

15 JinQianyu<sup>\*1</sup>, E-mail:11014041@zju.edu.cn

16 <sup>1</sup>State Key Laboratory of Rice Biology, China National Rice Research Institute,  
17 Hangzhou, 310006 China

18 <sup>2</sup>Ministry of Education Key Laboratory of Environmental Remediation and  
19 Ecosystem Health, College of Environmental and Resource Sciences, Zhejiang  
20 University, Hangzhou, 310058 China

21 <sup>¶</sup>These authors contributed equally to this work

22 <sup>\*</sup>Correspondence: Email: [11014041@zju.edu.cn](mailto:11014041@zju.edu.cn)

23 Phone number: (+86) 0571 63370355

24 Or Email: [592214410@qq.com](mailto:592214410@qq.com)

25 Phone number: (+86) 0571 88982079

26

27 Date of submission: 2<sup>th</sup> Aug, 2018

28 Number of tables: 0; Number of figures: 7; Number of words: 5221

29 Number of Manuscript Pages: 28

30 Number of figures to be in color in the print copy: 7

31 Specify which figures are to be printed in color: Fig. 1, 2, 3, 5, 7

32 Specify which figures are to be in color on line-only: Fig. 1, 2, 3, 5, 7

33 Supplementary data: Fig. S1, S2, S3, S4, Method S1

34 Highlight: NOS-mediated early NO burst plays an important role in alleviating  
35 oxidative damage induced by water stress, by enhancing the antioxidant defenses in  
36 roots supplemented with  $\text{NH}_4^+$

37

38 **Abstract**

39 Ammonium ( $\text{NH}_4^+$ ) can enhance rice drought tolerance in comparison to nitrate  
40 ( $\text{NO}_3^-$ ). The mechanism underpinning this relationship was investigated based on the  
41 time-dependent nitric oxide (NO) production and its protective role in oxidative stress  
42 of  $\text{NH}_4^+$ / $\text{NO}_3^-$ -supplied rice under drought. An early burst of NO was induced by  
43 drought 3h after root  $\text{NH}_4^+$  treatment but not after  $\text{NO}_3^-$  treatment. Root oxidative  
44 damage induced by drought was significantly higher in  $\text{NO}_3^-$  than in  $\text{NH}_4^+$ -treatment  
45 due to its reactive oxygen species accumulation. Inducing NO production by applying  
46 NO donor 3h after  $\text{NO}_3^-$  treatment alleviated the oxidative damage, while inhibiting  
47 the early NO burst increased root oxidative damage in  $\text{NH}_4^+$  treatment. Application of  
48 nitric oxide synthase (NOS) inhibitor N(G)-nitro-L-arginine methyl ester (L-NAME)  
49 completely suppressed NO synthesis in roots 3h after  $\text{NH}_4^+$  treatment and aggravated  
50 drought-induced oxidative damage, indicating the aggravation of oxidative damage  
51 might have resulted from changes in NOS-mediated early NO burst. Drought also  
52 increased root antioxidant enzymes activities, which were further induced by NO  
53 donor but repressed by NO scavenger and NOS inhibitor in  $\text{NH}_4^+$ -treated roots. Thus,  
54 the NOS-mediated early NO burst plays an important role in alleviating oxidative  
55 damage induced by drought by enhancing antioxidant defenses in  $\text{NH}_4^+$ -supplied rice  
56 roots.

57 **Keywords:** Ammonium, nitric oxide, nitric oxide synthase, antioxidant enzymes,  
58 oxidative damage, drought stress, rice

59

60 **Abbreviations:** ascorbate peroxidase (APX), catalase (CAT),  
61 2-(4-carboxyphenyl)-4,4,5,5-tetramethylimidazoline-1-oxyl-3-oxide (c-PTIO),  
62 N(G)-nitro-L-arginine methyl ester (L-NAME), malondialdehyde (MDA), nitric oxide  
63 (NO), nitric oxide synthase (NOS), nitrate reductase (NR), peroxynitrite ( $\text{ONOO}^-$ ),  
64 polyethylene glycol (PEG-6000), peroxidase (POD), reactive nitrogen species (RNS),  
65 reactive oxygen species (ROS), sodium nitroprusside (SNP), superoxide dismutase  
66 (SOD).

67

68 **Introduction**

69 As human population and global climate change increase, drought stress is  
70 becoming a major abiotic factor limiting crop growth and yield. Plants have evolved  
71 several strategies to contend with water stress. These include morphological,

72 physiological, and molecular adaptations (Bogeat-Triboulot *et al.*, 2007; Guo *et al.*,  
73 2007; Slewinski, 2012). Nitric oxide (NO) is an important signaling molecule in  
74 various physiological functions like seed germination, floral transition, stomatal  
75 movement, leaf senescence, and yield development, and it has gained increasing  
76 attention since the 1980s (Neill *et al.*, 2003; Wilson *et al.*, 2007; Simontacchi *et al.*,  
77 2015). Certain plant responses and adaptations to abiotic stresses involve NO, and  
78 sufficient data indicate that NO mediates plant responses to various stimuli including  
79 drought (Mata and Lamattina, 2001), salt (Zhao *et al.*, 2007), and metal toxicity  
80 (Gonzalez *et al.*, 2012) stresses, thereby enhancing plant stress tolerance and survival.

81 Water deficits significantly increase NO production in plants (Signorelli *et al.*,  
82 2013; Planchet *et al.*, 2014). As a free radical, NO can form various reactive nitrogen  
83 species (RNS) such as peroxynitrite (ONOO<sup>-</sup>), nitrogen dioxide (NO<sub>2</sub>),  
84 dinitrogen trioxide (N<sub>2</sub>O<sub>3</sub>) and S-nitrosoglutathione (GSNO), which are involved in  
85 many physiological functions of plants (del Rio, 2015), indicating that NO and  
86 NO-derived molecules take part in inorganic nitrogen (N) metabolism. A combination  
87 of transgenic technology and pharmacological analysis have indicated that NO  
88 induces antioxidant activity and alleviates water stress in plants in several ways: 1) It  
89 limits reactive oxygen species (ROS) accumulation and ROS-induced cytotoxic  
90 activity by inhibiting the ROS-producer NADPH oxidase via S-nitrosylation (Fan *et*  
91 *al.*, 2012); 2) It functions as an antioxidant and reacts with ROS (e.g. O<sub>2</sub><sup>-</sup>) to generate  
92 transient ONOO<sup>-</sup>, which is then scavenged by other cellular processes (del Rio, 2015);  
93 3) It induces the expression of genes coding for antioxidant enzymes, such as  
94 superoxide dismutase (SOD), ascorbate peroxidase (APX), and glutathione reductase  
95 (GR), and may increase enzyme activity by posttranslational modifications thereby  
96 reducing lipid peroxidation under water stress (Farooq *et al.*, 2009; Fan and Liu,  
97 2012); 4) It helps maintaining high vacuolar concentrations of osmotically active  
98 solutes and amino acids like proline (Verdoy *et al.*, 2006); and 5) It acts as a  
99 downstream abscisic acid (ABA) signal molecule and participates in  
100 “ABA-H<sub>2</sub>O<sub>2</sub>-NO-MAPK” signal transduction processes. It also increases plant  
101 antioxidant ability (Zhang *et al.*, 2007). The accumulation of ROS in water-stressed  
102 plants impairs the function of biochemical processes, damages organelles, and  
103 ultimately results in cell death (Jiang and Zhang, 2002). Therefore, endogenous NO  
104 production may enhance plant antioxidant capacity and help plant cells survive under  
105 various types of stresses.



106           However, NO also has biphasic properties on plants. The duality of its effects  
107 depends on stress duration and severity, and on the cell, tissue, and plants species  
108 (Neill, 2007; Santisree *et al.*, 2015). At low concentration or early stage of abiotic  
109 stress, NO participates in important functions in higher plants through its involvement  
110 in physiological and stress-related processes (as described above).  
111 Arasimowicz-Jelonek *et al.* (2009a, b) demonstrated that NO synthesis slightly  
112 increased in roots subjected to <10 h water deficit, but significantly up-regulated after  
113 prolonged ( $\geq 17$ h) drought. Under severe or protracted longtime stress, NO  
114 overproduction in plants can shift the cellular stress status from oxidative stress to  
115 severe nitrification stress, finally damaging proteins, nucleic acids, and membranes  
116 (Groß *et al.*, 2013; del Rio 2015). Protein tyrosine nitration is considered a good  
117 marker to evaluate the process of nitrosative stress under various abiotic environments  
118 (Corpas *et al.*, 2007, 2008). Excess NO can also act synergistically with ROS  
119 resulting in nitro-oxidative stress and eliciting undesirable toxic effects in plant cells  
120 (Signorelli *et al.*, 2013). Liao *et al.* (2012) and Sun *et al.* (2014) argued that the ability  
121 of endogenous or exogenous NO production in plants to alleviate oxidant damage was  
122 dose-dependent. Therefore, determining instantaneous plant NO content under  
123 drought stress may not completely reflect the specific role of NO in drought tolerance.

124           In higher plants, nitrate reductase (NR) and nitric oxide synthase (NOS) are the  
125 two key enzymes for NO production (Guo *et al.*, 2003; Neill *et al.*, 2003). Moreover,  
126 NR-dependent NO production occurs in response to pathogen infection (Shi and Li,  
127 2008), drought (Freschi *et al.*, 2010), and freezing (Zhao *et al.*, 2009).  
128 Arasimowicz-Jelonek *et al.* (2009a, b) applied the NO donor sodium nitroprusside  
129 (SNP) and GSNO to water-stressed cucumbers and demonstrated that both NR and  
130 NOS participated in drought tolerance. Shi *et al.* (2014) reported that rat neuronal NO  
131 synthase overexpression in rice plants increased their tolerance to drought stress, thus  
132 demonstrating the importance of NOS-mediated NO production in water deficit  
133 tolerance. Despite increasing knowledge on NO-mediated plant functions, NO origins  
134 and signaling in response to prolonged stress and their regulation in plant drought  
135 tolerance remain poorly understood.

136           Ammonium ( $\text{NH}_4^+$ ) and nitrate ( $\text{NO}_3^-$ ) are the two primary N sources for plants.  
137 It is known that the negative effects of drought stress on plant development can be  
138 more effectively alleviated by  $\text{NH}_4^+$  than  $\text{NO}_3^-$  supplementation, as evaluated by plant  
139 growth, physiological characteristics, and gene expression levels (Guo *et al.*, 2007,

140 Yang *et al.*, 2012; Ding *et al.*, 2015). NO has a key role in plant water stress  
141 acclimation and drought tolerance. Nevertheless, information on the dynamic changes  
142 in NO production and its role in drought acclimation in plants supplied with NO<sub>3</sub><sup>-</sup> or  
143 NH<sub>4</sub><sup>+</sup> during the early stages of water stress is scarce. In the present study, variations  
144 in endogenous NO production were monitored in roots supplied with this two N  
145 nutrition supplements during water stress. The specific role and origin of the  
146 endogenous NO produced were investigated using pharmacological methods. The  
147 present study revealed that an early NO burst is crucial for alleviating the water  
148 stress-induced oxidative damage through enhancement of antioxidant defenses in  
149 roots of NH<sub>4</sub><sup>+</sup>-supplied plants. Further analyses demonstrated that this early NO burst  
150 might be triggered by NOS-like enzymes.

151

## 152 **Materials and methods**

### 153 **Plant material and growth conditions**

154 Rice (*Oryza sativa* L. 'Zhongzheyong No. 1' *hybrid indica*) seedlings were grown  
155 hydroponically in a greenhouse. Seeds were sterilized in 1% (v/v) sodium  
156 hypochlorite solution. After germination, seeds were transferred to a 0.5 mmol L<sup>-1</sup>  
157 CaCl<sub>2</sub> solution (pH 5.5). Three days later, the seedlings were transferred to 1.5-L  
158 black plastic pots containing a solution with the following composition: NH<sub>4</sub>NO<sub>3</sub> (0.5  
159 mM), NaH<sub>2</sub>PO<sub>4</sub>·2H<sub>2</sub>O (0.18 mM), KCl (0.18 mM), CaCl<sub>2</sub>(0.36 mM), MgSO<sub>4</sub>·7H<sub>2</sub>O  
160 (0.6 mM), MnCl<sub>2</sub>·4H<sub>2</sub>O (9 μM), Na<sub>2</sub>MoO<sub>4</sub>·4H<sub>2</sub>O (0.1 μM), H<sub>3</sub>BO<sub>3</sub> (10 μM),  
161 ZnSO<sub>4</sub>·7H<sub>2</sub>O (0.7 μM), CuSO<sub>4</sub> (0.3 μM), and FeSO<sub>4</sub>·7H<sub>2</sub>O-EDTA (20 μM). All  
162 experiments were performed in a controlled growth room under the following  
163 conditions: 14/10 h light/dark photoperiod, 400 μmol m<sup>-2</sup> s<sup>-1</sup> light intensity, 28°C or  
164 23°C during day or night, respectively, and 60% relative humidity. The solution pH  
165 was adjusted to 5.5 with 5 mM 2-(N-Morpholino)ethanesulfonic acid (MES). The  
166 solution was replaced every 3 days.

167 After 6 days, seedlings of similar size were cultivated under one of the following  
168 treatments: 1 mM NO<sub>3</sub><sup>-</sup>, 1 mM NO<sub>3</sub><sup>-</sup> + 10% polyethylene glycol (PEG-6000), 1 mM  
169 NH<sub>4</sub><sup>+</sup>, or 1 mM NH<sub>4</sub><sup>+</sup> + 10% PEG-6000. Water stress was induced by adding 10%  
170 PEG-6000. Eight treatments were performed in the NO donor (i.e., SNP) experiments:  
171 NH<sub>4</sub><sup>+</sup>, NH<sub>4</sub><sup>+</sup> + SNP, NH<sub>4</sub><sup>+</sup> + PEG-6000, NH<sub>4</sub><sup>+</sup> + PEG-6000 + SNP, NO<sub>3</sub><sup>-</sup>, NO<sub>3</sub><sup>-</sup> + SNP,  
172 NO<sub>3</sub><sup>-</sup> + PEG-6000, and NO<sub>3</sub><sup>-</sup> + PEG-6000 + SNP. The final SNP concentration was 20  
173 μM. For each N nutrition experiment, treatments receiving sufficient water were

174 defined as control (CK) treatments.

175 For the NO  
176 scavenger 2-(4-carboxyphenyl)-4,4,5,5-tetramethylimidazoline-1-oxyl-3-oxide  
177 (c-PTIO, 100  $\mu$ M) experiment, rice seedlings supplied with 1 mM  $\text{NO}_3^-$  or 1 mM  
178  $\text{NH}_4^+$  solution were pretreated with c-PTIO for 3 h and then given sufficient water  
179 (CK) or subjected to water stress for 24 h under the same conditions as those  
180 described above.

181 To investigate the effects of the NO biosynthesis inhibitors, rice seedlings  
182 supplied with 1 mM  $\text{NO}_3^-$  or 1 mM  $\text{NH}_4^+$  solution were pretreated with the NO  
183 scavenger, tungstate NR inhibitor (100  $\mu$ M), or NOS inhibitor [Nx-Nitro-*L*-arginine  
184 methyl ester hydrochloride (L-NAME); 100  $\mu$ M] for 3 h, and then given sufficient  
185 water (CK) or subjected to water stress for 24 h under the same conditions as  
186 described above. There were eight treatments for each N nutrition: Tungstate,  
187 L-NAME, Tungstate + SNP, PEG-6000 + Tungstate, PEG-6000 + Tungstate + SNP,  
188 L-NAME + SNP, PEG-6000 + L-NAME, and PEG-6000 + L-NAME + SNP.

189

#### 190 **Determination of NO and ONOO<sup>-</sup> contents**

191 The 4-amino-5-methylamino-2',7'-difluorofluorescein diacetate (DAF-FM DA)  
192 probe was used to determine endogenous root NO levels (Sun *et al.*, 2014). Root tips  
193 (1 cm) were incubated with 10  $\mu$ M DAF-FM DA in the dark for 30 min, washed 3 $\times$   
194 with 20 mM HEPES-KOH (pH 7.4) to remove excess fluorescence, and then observed  
195 and photographed under a Nikon Eclipse 80i fluorescence microscope (Nikon, Tokyo,  
196 Japan; EX 460-500, DM 505, BA 510-560). The relative fluorescence intensity was  
197 measured with Photoshop v. 7.0 (Adobe Systems, Mountain View, CA, USA).

198 Root endogenous ONOO<sup>-</sup> was determined using the aminophenylfluorescein  
199 (APF) probe method. Root tips were incubated with 10  $\mu$ M APF dissolved in 10 mM  
200 Tris-HCl (pH 7.4) in the dark for 60 min, and then washed 3 $\times$  with 10 mM Tris-HCl.  
201 Fluorescence images and relative fluorescence intensities were analyzed as described  
202 above for NO.

203

#### 204 **Histochemical analyses**

205 Lipid peroxidation and root cell death were histochemically detected with  
206 Schiff's reagent and Evans blue (Yamamoto *et al.*, 2001). Root tips were incubated in  
207 Schiff's reagent for 20 min and washed by three consecutive immersions in 0.5% (w/v)

208  $K_2O_3S$  solution. A red/purple endpoint indicated the presence of aldehydes generated  
209 by lipid peroxidation. Roots were also washed by performing three serial immersions  
210 in distilled water, then incubated in 0.25% (w/v) Evans blue for 15 min, and finally  
211 washed 3× with distilled water. Roots stained with Schiff's reagent and Evans blue  
212 were immediately photographed under a Leica S6E stereomicroscope (Leica, Solms,  
213 Germany).

214 The oxidative damage level, specifically expressed as membrane lipid  
215 peroxidation and protein oxidative damage, were estimated by measuring the  
216 concentrations of malondialdehyde (MDA) and carbonyl group with  
217 2,4-dinitrophenylhydrazine (DNPH) according to the methods described in Velikova  
218 *et al.* (2000).

219

#### 220 **Determination of ROS contents**

221 Root  $O_2^-$  content was estimated using the method described in Liu *et al.* (2007)  
222 with some modifications: about 0.15 g fresh root was powdered with 2 mL of 65 mM  
223 phosphate buffer saline (PBS, pH 7.8) in a pre-cooled mortar, and centrifuged at 5,000  
224  $\times g$  for 10 min at 4 °C. Then, 0.9 mL of 65 mM PBS (pH 7.8) and 0.1 mL of 10 mM  
225 hydroxylammonium chloride were added to 1 mL of the root extract supernatant,  
226 thoroughly mixed, and left to react for 25 min. After this period, 1 mL of 1% (w/v)  
227 sulfanilamide and 1 mL of 0.02% (w/v)  
228 *N*-(1-naphthyl)-ethylenediaminedihydrochloride were added to 1 mL of root extract  
229 solution and left to react for 30 min. Absorbance was then measured at 540 nm.

230 Root  $H_2O_2$  content was determined by the photolorimetric method: ~0.15 g  
231 fresh root was powdered with 2 mL acetone in a pre-cooled mortar, and centrifuged at  
232 5,000  $\times g$  for 10 min at 4 °C. Then, 0.1 mL of 5% (w/v)  $TiSO_4$  and 0.1 mL pre-cooled  
233 ammonium hydroxide were added to 1 mL of the root extract supernatant, which was  
234 re-centrifuged at 5,000  $\times g$  for 10 min. The supernatant was discarded and the  
235 sediment was re-dissolved in 4 mL of 2 M  $H_2SO_4$ . The absorbance of the root extract  
236 solution was measured at 415 nm (Wang *et al.*, 2010).

237 Root  $OH^\cdot$  was analyzed by the methods described in Liu *et al.* (2010): ~0.1 g  
238 fresh root was powdered with 3 mL of 50 mM PBS (pH 7.0) in a mortar, and  
239 centrifuged at 10,000  $\times g$  for 10 min at 4 °C. Then, 1.0 mL of 25 mM PBS (pH 7.0)  
240 containing 5 mM 2-deoxy-*D*-ribose and 0.2 mM NADH were added to 1 mL of the  
241 root extract supernatant, completely blended, and left to react for 60 min at 35°C in

242 the dark. Following this incubation, 1 mL of 1% (w/v) thiobarbituric acid and 1 mL  
243 glacial acetic acid were added to the filtrate. The mixture was heated to 100°C for 30  
244 min and then placed on ice for 20 min. The absorbance of the root extract solution  
245 was then measured at 532 nm, and the OH<sup>-</sup> content was inferred from the production  
246 of MDA.

247

#### 248 **Determination of enzyme activities**

249 Fresh rice root samples (0.5 g) were homogenized in 5 mL of 10 mM phosphate  
250 buffer (pH 7.0) containing 4% (w/v) polyvinylpyrrolidone and 1 mM  
251 ethylenediaminetetraacetic acid. The supernatant was used as crude enzyme solution  
252 and collected by centrifugation at 12,000 × g for 15 min at 4°C. The activities of SOD,  
253 catalase (CAT), APX, and peroxidase (POD) were estimated using the  
254 photolorimetric methods described in Jiang and Zhang (2002) and Sachadyn-Krol  
255 *et al.* (2016).

256 Root NR and NOS activities were assayed using the methods described in  
257 Scheible *et al.* (1997) and Lin *et al.* (2012), with some modifications. Briefly, total  
258 protein was extracted using a buffer containing 100 mM HEPES-KOH (pH 7.5), 1  
259 mM EDTA, 10% (v/v) glycerol, 5 mM DTT, 0.5 mM phenylmethylsulfonyl fluoride,  
260 0.1% Triton X-100 (v/v), 1% PVP, and 20 μM FAD. The supernatant was collected by  
261 centrifugation at 12,000 × g for 20 min at 4°C, and then used to determine the NR and  
262 NOS activities at 520 nm and 340 nm, respectively.

#### 263 **Determination of arginine and citrulline**

264 Arginine and citrulline contents were estimated using the method described in  
265 Salazar *et al.* (2012). Briefly, 1.0 g root samples were frozen in liquid N<sub>2</sub> and  
266 extracted with 4 mL 80% (v/v) methanol, and then centrifuged at 10,000 × g for 5 min  
267 at 4 °C. The supernatant was then used in derivatization and reaction processes. Serial  
268 concentrations of amino acid standards were prepared as described above for the  
269 derivatizing reagent, and the derivatizing samples were used to determine the arginine  
270 and citrulline contents using liquid chromatography/electrospray ionization tandem  
271 mass spectroscopy(LC-ESI-MS).

272

#### 273 **Statistical analyses**

274 All experiments conducted in this study were performed in triplicate, at least. All

275 data, expressed as means  $\pm$  standard error (SE), were processed in SPSS v. 13.0 (IBM  
276 Corp., Armonk, NY, USA). The Least Significant Difference (LSD) test was used to  
277 determine statistical significant differences among the treatments ( $P < 0.05$ ). Figures  
278 were drawn in Origin v. 8.0 (OriginLab Corporation, Northampton, MA, USA).

279

## 280 **Results**

### 281 **Plant growth and physiological characteristics**

282 Growth- and physiology-related parameters, such as biomass, photosynthesis rate  
283 ( $P_n$ ), and root N uptake rate in rice seedlings supplied with different N sources were  
284 negatively and differently influenced by the 21 days water stress (Supplementary Fig.  
285 S1a-f). While there were significant decreases in the biomass of  $\text{NO}_3^-$ -supplied plants  
286 (62.1% and 52.2% reductions in shoot and total biomass, respectively)  
287 (Supplementary Fig. S1a, c), biomass accumulation was not significantly affected in  
288  $\text{NH}_4^+$ -supplied plants, in relation to CK plants. Water stress reduced  $P_n$  in the leaves  
289 of  $\text{NO}_3^-$ -treated plants by 40.4% ( $P < 0.05$ ) but that of  $\text{NH}_4^+$ -treated plants was only  
290 reduced by 17.3% (Supplementary Fig. S1d) in relation to CK plants. Thus,  
291  $\text{NH}_4^+$ -supplied rice seedlings can alleviate PEG-induced drought stress more  
292 effectively than  $\text{NO}_3^-$ -supplied rice seedlings.

293

### 294 **Root endogenous NO production and histochemical analyses of oxidative damage**

295 To investigate whether NO participates in water stress acclimation, endogenous  
296 NO levels in the roots were monitored with the NO-specific fluorescent probe  
297 DAF-FM DA. Significant differences in endogenous NO production were observed in  
298 roots after 48 h of water stress (Fig. 1a). In CK plants, NO production was relatively  
299 stable and varied little between the two N treatments. In contrast, water stress  
300 significantly induced endogenous NO production 3 h after the roots received  $\text{NH}_4^+$ .  
301 However, endogenous NO gradually increased only after 6 h in the  $\text{NO}_3^-$  treatment.  
302 Relative fluorescence indicated a significant early burst of NO at 3 h of water stress in  
303 the  $\text{NH}_4^+$  treatment relative to the control. The NO level in the seedlings treated with  
304  $\text{NH}_4^+$  was 2.92 $\times$  higher than that of  $\text{NO}_3^-$ -treated plants. Nevertheless, NO in the  
305  $\text{NO}_3^-$ -treated seedlings was 2.72 $\times$  higher than in  $\text{NH}_4^+$ -treated plants after 24 h of  
306 water stress (Fig. 1b).

307 Histochemical visualization by Schiff's reagent and Evans blue staining showed  
308 that water stress caused severe oxidative damage to the plasma membrane and cell



309 death in the roots of the plants receiving  $\text{NO}_3^-$ , whereas the damage was far less  
310 pronounced in the seedlings given  $\text{NH}_4^+$  (Fig. 1c, d). The following analysis of the  
311 MDA and carbonyl concentrations also confirmed that water stress induced more  
312 severe lipid peroxidation in the roots of  $\text{NO}_3^-$ -treated than in the roots of  $\text{NH}_4^+$ -treated  
313 seedlings.

314

### 315 **Effects of the NO donor on root NO production and oxidative damage**

316 To determine the roles of NO in water stress tolerance, the NO donor SNP was  
317 used to simulate NO production. Pre-experimentation with various SNP  
318 concentrations (0-100  $\mu\text{M}$ ) was performed to quantify the efficacy of SNP against root  
319 oxidative damage. As shown in Supplementary Fig. S2, root oxidative damage  
320 induced by water stress was significantly alleviated by  $\leq 20 \mu\text{M}$  SNP. However, the  
321 remedial effect of SNP on root oxidative damage was reversed at higher application  
322 doses ( $\geq 40 \mu\text{M}$ ), suggesting that high SNP or NO contents are toxic to root growth.  
323 Therefore, 20  $\mu\text{M}$  SNP was used in the NO donor experiments conducted in the  
324 present study. After 3 h of water stress, SNP application significantly increased root  
325 NO fluorescence intensity for both N treatments. At 3 h, the NO production levels  
326 were  $\sim 2.05\times$  and  $3.85\times$  higher in the SNP-treated roots of the seedlings receiving  
327  $\text{NH}_4^+$  and  $\text{NO}_3^-$ , respectively, than in the roots of CK plants (Fig. 2a, b). However, this  
328 phenomenon was not observed after 24 h of water stress.

329 After 3 h of water stress, ROS ( $\text{O}_2^-$ ,  $\text{H}_2\text{O}_2$ , and  $\text{OH}^\cdot$ ) levels were increased in the  
330 roots of both the  $\text{NH}_4^+$ - and  $\text{NO}_3^-$ -treated seedlings in relation to that of CK seedlings.  
331 Under water stress, the  $\text{O}_2^-$ ,  $\text{H}_2\text{O}_2$ , and  $\text{OH}^\cdot$  in the roots given  $\text{NH}_4^+$  and  $\text{NO}_3^-$  increased  
332 by 78.1% and 107.3%, 28.3% and 47.8%, and 10.6% and 48.4%, respectively (Fig.  
333 3a-c). After 3 h of water stress, root MDA and carbonyl were  $\sim 1.28\times$  and  $1.4\times$  higher  
334 in the plants receiving  $\text{NO}_3^-$  than in CK plants, respectively. In turn, MDA and  
335 carbonyl levels were significantly higher in the CK than in the plants given  $\text{NH}_4^+$  (Fig.  
336 4a, b). Water stress induced higher root  $\text{ONOO}^-$  in the  $\text{NH}_4^+$ -treated plants than in the  
337  $\text{NO}_3^-$ -treated seedlings (Fig. 4d), and exogenous NO significantly reduced water  
338 stress-induced ROS ( $\text{O}_2^-$  and  $\text{H}_2\text{O}_2$ ) accumulation and oxidative damage (as reflected  
339 by MDA and carbonyl) in both N treatments (Figs. 3, 4).

340 To determine whether the alleviation of water stress-induced oxidative damage  
341 by SNP was related to NO production, the NO scavenger c-PTIO was applied to the  
342 plants. After pretreatment with 100  $\mu\text{M}$  c-PTIO for 3 h, alleviation of the water

343 stress-induced root oxidative damage by SNP was reversed (Fig. 4). Depletion of  
344 endogenous NO by c-PTIO significantly aggravated root oxidative damage in the  
345  $\text{NH}_4^+$ -treated plants but had no significant effect on the  $\text{NO}_3^-$ -treated plants (Fig. 4), in  
346 relation to that observed in CK plants. Therefore, the water stress-induced early NO  
347 burst observed in the  $\text{NH}_4^+$ -treated plants alleviates root oxidative damage by  
348 reducing ROS, such as  $\text{O}_2^-$  and  $\text{H}_2\text{O}_2$ .

349

### 350 **Source of endogenous NO**

351 Endogenous plant NO production is mostly driven by NR and NOS. Water stress  
352 increased NR activity in the  $\text{NO}_3^-$ -treated roots, and this activity was higher at 24 h  
353 than it was at 3 h of water stress (Supplementary Fig. S3a). The activity of NOS was  
354 also significantly elevated at 3 h of water stress, and significantly higher in the  
355  $\text{NH}_4^+$ -treated than in the  $\text{NO}_3^-$ -treated roots (Supplementary Fig. S3b). In contrast,  
356 water stress suppressed NOS activity in the  $\text{NO}_3^-$ -treated roots at 24 h. Tungstate and  
357 L-NAME, which inhibit NR and NOS activities, respectively, were used to identify  
358 the origin of the early NO burst in the  $\text{NH}_4^+$ -treated roots. Although L-NAME  
359 significantly inhibited endogenous NO production in the  $\text{NH}_4^+$ -treated roots under 3 h  
360 water stress, it had no significant effect in the  $\text{NO}_3^-$ -treated roots. At 24 h, the  
361 tungstate and L-NAME applications suppressed NO production in the  $\text{NO}_3^-$ -treated  
362 roots and tungstate had the stronger inhibitory effect. On the other hand, tungstate had  
363 no significant effect on NO production in the  $\text{NH}_4^+$ -treated roots (Fig. 5a, b).

364 The effect of SNP on the alleviation of water stress-induced root oxidative  
365 damage was reversed after pretreatment with 100  $\mu\text{M}$  c-PTIO for 3 h. Application of  
366 the NOS inhibitor c-PTIO significantly aggravated water stress-induced oxidative  
367 damage in the  $\text{NH}_4^+$ -treated roots, and SNP application reversed the effect of the NOS  
368 inhibitor but not that of the NR inhibitor (Fig. 5c, d). For the  $\text{NO}_3^-$ -treated roots, the  
369 application of the NR inhibitor or NOS inhibitor had no significant effect on root  
370 oxidative damage relative to the PEG (water stress) treatment.

371

### 372 **Activities of antioxidative enzymes and nitrate/nitrite and arginine/citrulline** 373 **metabolism**

374 Water stress significantly enhanced the activities of root antioxidant enzymes  
375 CAT, SOD, APX, and POD by ~107% and 38%, 52% and 36%, 152% and 128%, and  
376 45% and 37% in the  $\text{NH}_4^+$ -treated roots and the  $\text{NO}_3^-$ -treated roots, respectively,



377 compared to the CK roots (Fig. 6). While SNP application further increased CAT,  
378 SOD, and APX activities (Fig. 6a-c), these antioxidant enzymes were inhibited by the  
379 application of the NO scavenger c-PTIO and by the NOS inhibitor L-NAME in the  
380  $\text{NH}_4^+$ -treated roots under water stress.

381 As NR and NOS activities increased in the  $\text{NO}_3^-$ -treated roots, water stress  
382 lowered the nitrate level in the NR pathway and the arginine level in the NOS  
383 pathway (Supplementary Fig. S4a, b). Similarly, NR inhibitor and NOS inhibitor  
384 applications enhanced root nitrate and arginine contents, respectively. In the  
385  $\text{NH}_4^+$ -treated roots, water stress significantly decreased arginine level, indicating that  
386 arginine metabolism was relatively high. In this treatment, the NR inhibitor had no  
387 significant effect on root arginine content. On the other hand, the NOS inhibitor  
388 suppressed arginine metabolism, and thus the  $\text{NH}_4^+$ -treated roots had higher arginine  
389 levels than CK roots (Supplementary Fig. S4c). These results indicate that the NO  
390 production burst in the  $\text{NH}_4^+$ -treated roots might originate from the NOS pathway.

391

## 392 Discussion

393 Ample experimental evidence has demonstrated that NO is involved in plant  
394 abiotic stress (Neill *et al.*, 2003; Santisree *et al.*, 2015). However, to our knowledge,  
395 no detailed study has been conducted to evaluate the role of NO in drought  
396 acclimation in plants supplied with  $\text{NO}_3^-$  or  $\text{NH}_4^+$ . In the present study, biomass, root  
397 N uptake rate, and leaf photosynthesis were reduced relative to the control treatments  
398 after 21 days of water stress (Supplementary Fig. S1). However, these reductions were  
399 less severe for seedlings receiving  $\text{NH}_4^+$  suggesting that  $\text{NH}_4^+$  supplementation can  
400 enhance drought tolerance in rice seedlings more effectively than  $\text{NO}_3^-$   
401 supplementation (Guo *et al.*, 2007; Li *et al.*, 2012). Our study also demonstrated that,  
402 in the short term (48 h), endogenous NO production in response to water stress is  
403 usually time-dependent, varying according to water stress duration. This finding is  
404 consistent with those reported for other stressors (Planchet *et al.*, 2014; Sun *et al.*,  
405 2014). Early NO bursts were induced at 3 h of water stress in the roots of  
406  $\text{NH}_4^+$ -treated seedlings but not in the roots of  $\text{NO}_3^-$ -treated seedlings. Thus, there  
407 might be significant differences between  $\text{NH}_4^+$ -/ $\text{NO}_3^-$ -supplied plants in terms of NO  
408 signal-mediated drought tolerance. In addition, accumulation of ROS, such as  $\text{O}_2^-$ ,  
409 OH $\cdot$ , and  $\text{H}_2\text{O}_2$ , and root oxidative damage were significantly lower in the  
410  $\text{NH}_4^+$ -treated than in the  $\text{NO}_3^-$ -treated roots at 3 h of water stress. Because ROS

411 accumulation damages cells and their plasma membranes by inducing lipid  
412 peroxidation (oxidative stress) (Jiang and Zhang, 2002), the early NO burst in  
413 response to water stress observed in  $\text{NH}_4^+$ -supplied seedlings might play a crucial role  
414 in their antioxidant defense system and drought tolerance.

415 The role of the early NO burst in the water stress tolerance of  
416  $\text{NH}_4^+$ / $\text{NO}_3^-$ -supplied seedlings was confirmed using NO donors and scavengers. Our  
417 study demonstrated that NO donors induced NO in the  $\text{NO}_3^-$ -treated roots at 3 h but  
418 not at 24 h of water stress. Plant ROS accumulation and MDA and carbonyl levels  
419 under water stress were significantly alleviated after the application of the NO donor  
420 in both N treatments. Nevertheless, the levels of these substances were higher in the  
421  $\text{NO}_3^-$ -treated roots than in the  $\text{NH}_4^+$ -treated roots. Therefore, the NO production  
422 enhanced at 3 h by the exogenous NO donor can alleviate water stress-induced  
423 oxidative damage in the  $\text{NO}_3^-$ -treated roots. On the other hand, elimination of the  
424 early NO burst by NO scavengers like c-PTIO significantly aggravated water  
425 stress-induced oxidative damage. These results provide direct evidence that the early  
426 NO bursts plays a crucial role in drought tolerance in  $\text{NH}_4^+$ -treated roots. Because  
427 the  $\text{NH}_4^+$ -supplied roots maintained a higher N uptake rate than  $\text{NO}_3^-$ -supplied roots  
428 under water stress (Supplementary Fig. S1f), we hypothesized that the higher  $\text{NH}_4^+$   
429 uptake rate is beneficial for the NO early burst due to the NO production involved in  
430 root N metabolism (Corpas *et al.*, 2008; del Rio, 2015). This NO burst can also be an  
431 active adaptation mechanism of plants to abiotic stress as, in addition to drought stress,  
432 it has been reported to occur repeatedly in plants challenged by pathogens  
433 (Floryszak-Wieczorek *et al.*, 2007), metal toxicity (Gonzalez *et al.*, 2012; Sun *et al.*,  
434 2014), and cold stress (Cantrel *et al.*, 2011).

435 Our study demonstrated that an early NO burst improves plant drought tolerance  
436 by enhancing the antioxidant defense system of the root. Elevated plant antioxidant  
437 enzyme activities and gene expression levels in response to water stress have been  
438 widely demonstrated (Jiang and Zhang, 2002; Arasimowicz-Jelonek *et al.*, 2009a; Fan  
439 and Liu, 2012). In the present study, the tips of the  $\text{NO}_3^-$ -treated roots presented more  
440 serious water stress-induced oxidative damage (due to the excessive production of  $\text{O}_2^-$ ,  
441  $\text{OH}^-$ , and  $\text{H}_2\text{O}_2$ ) than those of the  $\text{NH}_4^+$ -treated roots (Figs. 1-3). In contrast,  
442  $\text{NH}_4^+$ -supplied roots maintained relatively higher antioxidant enzyme (CAT, SOD, and  
443 APX) activity levels to catalyze  $\text{O}_2^-$  and  $\text{H}_2\text{O}_2$  decomposition (Fig. 3). It has been

444 demonstrated that there is significant crosstalk between NO and ROS in plants. The  
445 antioxidant function of NO was explained by its ability to reduce H<sub>2</sub>O<sub>2</sub> and lipid  
446 peroxidation, and induce antioxidant gene expression and enzyme activity  
447 (Bogeat-Triboulot *et al.*, 2007; Farooq *et al.*, 2009). Our results showed that enhanced  
448 NO levels and antioxidant enzyme activities (CAT and SOD) were significantly and  
449 simultaneously increased after NO donor application in NO<sub>3</sub><sup>-</sup>-treated roots thereby  
450 reducing ROS concentration and oxidative damage. The early NO burst observed in  
451 NH<sub>4</sub><sup>+</sup>-treated roots can enhance antioxidant enzyme activity and ROS accumulation  
452 (O<sub>2</sub><sup>-</sup>, OH<sup>·</sup>, and H<sub>2</sub>O<sub>2</sub>). These results were confirmed by subsequent experimentation in  
453 which the application of NO scavenger significantly suppressed SOD and CAT in  
454 NH<sub>4</sub><sup>+</sup>-treated roots. Thus, drought tolerance in the NH<sub>4</sub><sup>+</sup>-treated roots might be  
455 associated with the NO induced up-regulation of antioxidant enzymes and  
456 down-regulation of ROS accumulation.

457 Nitric oxide can also serve as a source of reactive nitrogen species (RNS). Over  
458 accumulation of RNS under abiotic stress can cause tyrosine nitration and inactivate  
459 proteins like CAT, manganese-dependent (Mn-)SOD, and GR (Clark *et al.*, 2000) as  
460 well as the peroxidative activity of cytochrome c (Batthyany *et al.*, 2005). Our results  
461 show that NO<sub>3</sub><sup>-</sup>-supplied plants had more severe oxidative damage and accumulated  
462 extremely high NO levels after 24 h of water stress. This latent NO production can be  
463 partially alleviated by replenishing the early NO burst at 3 h with SNP (Fig. 1). These  
464 results indicate that both ROS and RNS metabolism participate in the water stress  
465 response. High NO accumulation in the NO<sub>3</sub><sup>-</sup>-treated roots likely cause the nitrosative  
466 stress at 24 h, which also damaged root redox balance. A similar phenomenon was  
467 described in plants subjected to cold (Airaki *et al.*, 2012), salinity (Tanou *et al.*, 2012),  
468 and drought (Signorelli *et al.*, 2013) stresses. Because NO competes with oxygen for  
469 cytochrome c oxidase binding (Complex IV), it affects both the respiratory chain and  
470 oxidative phosphorylation (Millar and Day, 1996; Yamasaki *et al.*, 2001). Thus, under  
471 drought stress, the higher NO production in the NO<sub>3</sub><sup>-</sup>-treated roots than in the  
472 NH<sub>4</sub><sup>+</sup>-treated roots could aggravate respiratory inhibition and induce greater oxidative  
473 damage.

474 Our investigation suggests that the early NO burst in NH<sub>4</sub><sup>+</sup>-treated roots is  
475 mainly mediated NOS at the early stages of water stress. Nitrate reductase-mediated  
476 NO generation is known to occur under water deficit (Arasimowicz-Jelonek *et al.*,  
477 2009b; Yu *et al.*, 2014). Drought-induced NO generation by NOS-like enzymes in

478 plants has also been demonstrated but this NO production pathway varies significantly  
479 with species, tissue type, and plant growth conditions (Corpas *et al.*, 2009; Liao *et al.*,  
480 2012; Shi *et al.*, 2014). For the  $\text{NH}_4^+$ -treated roots, both NOS activity and NO  
481 production increased simultaneously at 3h of water stress, whereas the application of  
482 the NOS inhibitor completely repressed NO synthesis at this time point. The NOS  
483 inhibitor also aggravated water stress-induced membrane lipid peroxidation and  
484 oxidative protein damage, indicating that some NOS associated proteins may play an  
485 important role in NO-mediated drought protective responses (Guo *et al.*, 2003; Zhao  
486 *et al.*, 2007). In contrast, the NR inhibitor did not significantly affect NO production  
487 or membrane lipid peroxidation. The aggravation of lipid peroxidation by L-NAME  
488 may have been the result of the alteration of the NOS-mediated early NO burst. In  
489  $\text{NO}_3^-$ -treated roots, water stress enhanced NR activity significantly more than NOS  
490 activity at 24 h. However, separate NR inhibitor and NOS inhibitor applications only  
491 partially suppressed NO production. The NO produced by the NR pathway might  
492 therefore play an important role in later NO production (24 h), consistent with  
493 previous reports (Arasimowicz-Jelonek *et al.*, 2009a, b). Although several studies  
494 support the arginine-dependent NO production model in higher plants, the genes  
495 encoding NOS in such plants have not yet been identified (Zemojtel *et al.*, 2006). For  
496 this reason, the nitrate/nitrite and arginine/citrulline levels in the NR and NOS  
497 pathway, respectively, were determined. It was found that water stress significantly  
498 increased NOS activity and accelerated the conversion of arginine to citrulline.  
499 However, the arginine content was significantly enhanced in the  $\text{NH}_4^+$ -treated roots  
500 after the NOS inhibitor application, in relation to the CK roots. These results provide  
501 additional evidence that the early NO burst in  $\text{NH}_4^+$ -treated roots is mainly mediated  
502 by NOS (Fig. 7).

503 Our study is the first to demonstrate that the early NO burst in  $\text{NH}_4^+$ -treated rice  
504 roots significantly enhanced plant antioxidant defense by reducing ROS accumulation  
505 and enhancing the activities of antioxidant enzymes, thereby increasing plants'  
506 acclimation to water stress. The early NO burst which occurs in response to water  
507 stress may be triggered by NOS-like enzymes in root. Our results provide new insight  
508 into how NO-signaling molecules modulate drought tolerance in  $\text{NH}_4^+$ -supplied rice  
509 plants. However, the signaling crosstalk between ROS and RNS in response to water  
510 stress merits further investigation and may help elucidate the role of the NO-signaling  
511 process in enhancing drought tolerance in  $\text{NH}_4^+$ -supplied rice.

512

513 **Supplementary data**

514 **Fig. S1.** Responses to water stress in  $\text{NH}_4^+$ - and  $\text{NO}_3^-$ -supplied rice

515 **Fig. S2.** Effects of exogenous nitric oxide donor on root oxidative damage under  
516 water stress

517 **Fig. S3.** Effect of water stress on nitrate reductase and nitric oxide synthase in rice  
518 roots

519 **Fig. S4.** Levels of nitric oxide-related compounds under sufficient water or water  
520 stress

521 **Method S1.** Determination of leaf photosynthesis, root N uptake rate, root nitrate and  
522 nitrite content in rice seedlings after 21 days under control or water stress treatments

523

524 **Acknowledgements**

525 This work was supported by the National Key Research and Development Program of  
526 China (No. 2017YFD0300100, 2016YFD0101801); the Natural Science Foundation  
527 of Zhejiang Province (No. LY18C130005). We would like to thank Editage  
528 [www.editage.cn] for English language editing.

## References

- Airaki M, Leterrier M, Mateos RM, Valderrama R, Chaki M, Barroso JB, del Río LA, Palma JM, Corpas FJ.** 2012. Metabolism of reactive oxygen species and reactive nitrogen species in pepper (*Capsicum annuum* L.) plants under low-temperature stress. *Plant Cell and Environment* **35**, 281-295.
- Arasimowicz-Jelonek M, Floryszak-Wieczorek J, Kubis J.** 2009a. Involvement of nitric oxide in water stress-induced responses of cucumber roots. *Plant Science* **177**, 682-690.
- Arasimowicz-Jelonek M, Floryszak-Wieczorek J, Kubis J.** 2009b. Interaction between polyamine and nitric oxide signaling in adaptive responses to drought in cucumber. *Journal of Plant Growth Regulation* **28**,177-186.
- Batthyany C, Souza JM, Duran R, Cassina A, Cervenansky C, Radi R.** 2005. Time course and site(s) of cytochrome c tyrosine nitration by peroxynitrite. *Biochemistry* **44**, 8038-8046.
- Bogeat-Triboulot MB, Brosche M, Renaut J, Jouve L, Le Thiec D, Fayyaz P.** 2007. Gradual soil water depletion results in reversible changes of gene expression, protein profiles, ecophysiology, and growth performance in *Populuseuphratica*, a poplar growing in arid regions. *Plant Physiology* **143**, 876-892.
- Cantrel C, Vazquez T, Puyaubert J, Rezé N, Lesch M, Kaiser WM, Dutilleul C, Guillas I, Zachowski A, Baudouin E.** 2011. Nitric oxide participates in cold-responsive phosphosphingolipid formation and gene expression in *Arabidopsis thaliana*. *New Phytologist* **189**, 415-427.
- Clark D, Durner J, Navarre DA, Klessig DF.** 2000. Nitric oxide inhibition of tobacco catalase and ascorbate peroxidase. *Molecular Plant-Microbe Interactions* **13**, 1380-1384.
- Corpas FJ, del Río LA, Barroso JB.** 2007. Need of biomarkers of nitrosative stress in plants. *Trends in Plant Science* **12**, 436-438.
- Corpas FJ, Chaki M, Fernández-Ocana A, Valderrama R, Palma JM, Carreras A, Begara-Morales JC, Airaki M, del Río LA, Barroso JB.** 2008. Metabolism of reactive nitrogen species in pea plants under abiotic stress conditions, *Plant Cell Physiology* **49**, 1711-1722.
- Corpas FJ, Palma JM, del Río LA, Barroso JB.** 2009. Evidence supporting the

existence of L-arginine-dependent nitric oxide synthase activity in plants. *New Phytologist* **184**, 9-14.

**Del Rio LA.** 2015. ROS and RNS in plant physiology: an overview. *Journal of Experiment Botany* **66**, 2827-2837.

**Ding L, Gao C, Li Y, Li Y, Zhu Y, Xu G, Shen Q, Kaldenhoff R, Kai L, Guo S.** 2015. The enhanced drought tolerance of rice plants under ammonium is related to aquaporin (AQP). *Plant Science* **234**, 14-21.

**Fan HH, Li TC, Guan L, Li ZP, Guo N, Cai YP, Lin Y.** 2012. Effects of exogenous nitric oxide on antioxidation and DNA methylation of *Dendrobiumhuoshanense* grown under drought stress. *Plant Cell Tissue and Organ Culture* **109**, 307-314.

**Fan QJ, Liu JH.** 2012. Nitric oxide is involved in dehydration/drought tolerance in *Poncirus trifoliata* seedlings through regulation of antioxidant systems and stomatal response. *Plant Cell and Reports* **31**, 145-154.

**Farooq M, Basra SMA, Wahid A, Rehman H.** 2009. Exogenously applied nitric oxide enhances the drought tolerance in fine grain aromatic rice (*Oryza sativa* L.). *Journal of Agronomy and Crop Science* **195**, 254-261.

**Floryszak-Wieczorek J, Arasimowicz M, Milczarek G, Jelen H, Jackowiak H.** 2007. Only an early nitric oxide burst and the following wave of secondary nitric oxide generation enhanced effective defence responses of pelargonium to a necrotrophic pathogen. *New Phytologist* **175**, 718-730.

**Freschi L, Rodrigues MA, Domingues DS, Purgatto E, Van Sluys MA, Magalhaes JR, Kaiser WM, Mercier H.** 2010. Nitric oxide mediates the hormonal control of Crassulacean acid metabolism expression in young pineapple plants. *Plant Physiology* **152**, 1971-1985.

**Gonzalez A, de los Angeles Cabrera M, Henríquez MJ, Contreras RA, Morales B,**

**Moenne A.** 2012. Cross talk among calcium, hydrogen peroxide, and nitric oxide and activation of gene expression involving calmodulins and calcium-dependent protein kinases in *Ulvacompressa* exposed to copper excess. *Plant Physiology* **158**, 1451-1462.

**Groß F, Durner J, Gaupels F.** 2103. Nitric oxide, antioxidants and prooxidants in plant defence responses. *Frontiers in Plant Science* **4**,419.

**Guo FQ, Okamoto M, Crawford NM.** 2003. Identification of a plant nitric oxide synthase gene involved in hormonal signaling. *Science* **302**, 100-103.



- Guo P, Cao Y, Li Z, Zhao B.** 2004. Role of an endogenous nitric oxide burst in the resistance of wheat to stripe rust. *Plant Cell and Environment* **27**, 473-477.
- Guo SW, Zhou Y, Shen QR, Zhang FS.** 2007. Effect of ammonium and nitrate nutrition on some physiological processes in higher plants-growth, photosynthesis, photorespiration, and water relations. *Plant Biology* **9**, 21-29.
- Jiang MY, Zhang JH.** 2002. Water stress-induced abscisic acid accumulation triggers the increased generation of reactive oxygen species and up-regulates the activities of antioxidant enzymes in maize leaves. *Journal of Experimental Botany* **53**, 2401-2410.
- Liao WB, Huang GB, Yu JH, Zhang ML.** 2012. Nitric oxide and hydrogen peroxide alleviate drought stress in marigold explants and promote its adventitious root development. *Plant Physiology and Biochemistry* **58**, 6-15.
- Lin A, Wang Y, Tang J, Xue P, Li C, Liu L, Hu B, Yang F, Loake GJ, Chu C.** 2012. Nitric oxide and protein S-nitrosylation are integral to hydrogen peroxide-induced leaf cell death in rice. *Plant Physiology* **158**, 451-464.
- Liu Y, Wu R, Wan Q, Xie G, Bi Y.** 2007. Glucose-6-phosphate dehydrogenase plays a pivotal role in nitric oxide-involved defense against oxidative stress under salt stress in red kidney bean roots. *Plant and Cell Physiology* **48**, 511-522.
- Liu Y, Jiang H, Zhao Z, An L.** 2010. Nitric oxide synthase-like activity-dependent nitric oxide production protects against chilling-induced oxidative damage in *Chorisporabungeana* suspension cultured cells. *Plant Physiology and Biochemistry* **48**, 936-944.
- Mata CG, Lamattina L.** 2001. Nitric oxide induces stomatal closure and enhances the adaptive plant responses against drought stress. *Plant Physiology* **126**, 1196-1204.
- Millar AH, Day AD.** 1996. Nitric oxide inhibits the cytochrome oxidase but not the alternative oxidase of plant mitochondria. *FEBS Letters* **398**, 155-158.
- Neill SJ, Desikan R, Hancock JT.** 2003. Nitric oxide signalling in plants. *New Phytologist* **159**, 11-35.
- Neill S.** 2007. Interactions between abscisic acid, hydrogen peroxide and nitric oxide mediate survival responses during water stress. *New Phytologist* **175**, 4-6.
- Planchet E, Verdu I, Delahaie J, Cukier C, Girard C, Paven MM, Limami AM.** 2014. Abscisic acid-induced nitric oxide and proline accumulation in independent pathways under water-deficit stress during seedling establishment in *Medicago truncatula*. *Journal of Experimental Botany* **65**, 2161-2170.
- Sachadyn-Krol M, Materska M, Chilczuk B, Kara M, Jakubczyk A, Perucka I,**



- Jackowska I.** 2016. Ozone-induced changes in the content of bioactive compounds and enzyme activity during storage of pepper fruits. *Food Chemistry* **211**,59-67.
- Salazar C, Armenta JM, Shulaev V.** 2012. An UPLC-ESI-MS/MS assay using 6-aminoquinolyl-N-hydroxysuccinimidyl carbamate derivatization for targeted amino acid analysis: application to screening of *Arabidopsisthaliana* mutants. *Metabolites* **2**, 398-428.
- Santisree P, Bhatnagar-Mathur P, Sharma KK.** 2015. NO to drought-multifunctional role of nitric oxide in plant drought: Do we have all the answers? *Plant Science* **239**, 44-55.
- Scheible WR, Lauerer M, Schulze ED, Caboche M, Stitt M.** 1997. Accumulation of nitrate in the shoot acts as a signal to regulate shoot-root allocation in tobacco. *Plant Journal* **11**, 671-691.
- Shi FM, Li YZ.** 2008. *Verticilliumdahliae* toxins-induced nitric oxideproduction in Arabidopsis is major dependent on nitrate reductase. *BMB Reports* **41**, 79-85.
- Shi H, Ye T, Zhu J, Chan Z.** 2014. Constitutive production of nitric oxide leads to enhanced drought stress resistance and extensive transcriptional reprogramming in Arabidopsis. *Journal of Experimental Botany* **6**, 4119-4413.
- Signorelli S, Corpas FJ, Omar Borsani O, Barroso JB, Monza J.** 2013. Water stress induces a differential and spatially distributed nitro-oxidative stress response in roots and leaves of *Lotusjaponicus*. *Plant Science* **201-202**, 137-146.
- Simontacchi M, Galatro A, Ramos-Artuso F, Santa-María GE.** 2015. Plant survival in a changing environment: the role of nitric oxide in plant responses to abiotic stress. *Frontiers in Plant Science* **6**, 977.
- Slewiniski TL.** 2012. Non-structural carbohydrate partitioning in grass stems: a target to increase yield stability, stress tolerance, and biofuel production. *Journal of Experimental Botany* **63**, 4647-4670.
- Sun CL, Lu LL, Liu LJ, Liu WJ, Yu Y, Liu XX, Hu Y, Jin CW, Lin XY.** 2014. Nitrate reductase-mediated early nitric oxide burst alleviates oxidative damage induced by aluminum through enhancement of antioxidant defenses in roots of wheat (*Triticumaestivum*). *New Phytologist* **201**, 1240-1250.
- Tanou G, Filippou P, Belghazi M, Job D, Diamantidis G, Fotopoulos V, Molassiotis A.** 2012. Oxidative and nitrosative-based signaling and associated post-translational modifications orchestrate the acclimation of citrus plants to salinity

stress. *Plant Journal* **72**, 585-599.

**Velikova V, Yordanov I, Edreva A.** 2000. Oxidative stress and some antioxidant systems in acid rain-treated bean plants: protective role of exogenous polyamines. *Plant Science* **151**, 59-66.

**Verdoy D, Coba De La Peña T, Redondo FJ, Lucas MM, Pueyo JJ.** 2006. Transgenic *Medicago truncatula* plants that accumulate proline display nitrogen-fixing activity with enhanced tolerance to osmotic stress. *Plant Cell and Environment* **29**, 1913-1923.

**Wang HH, Huang JJ, Bi YR.** 2010. Nitrate reductase-dependent nitric oxide production is involved in aluminum tolerance in red kidney bean roots. *Plant Science* **179**, 281-288.

**Wilson ID, Neill SJ, Hancock JT.** 2007. Nitric oxide synthesis and signalling in plants. *Plant Cell and Environment* **31**, 622-631.

**Yamamoto Y, Kobayashi Y, Matsumoto H.** 2001. Lipid peroxidation is an early symptom triggered by aluminum, but not the primary cause of elongation inhibition in pea roots. *Plant Physiology* **125**, 199-208.

**Yamasaki H, Shimoji H, Ohshiro Y, Sakihama Y.** 2001. Inhibitory effects of nitric oxide on oxidative phosphorylation in plant mitochondria. *Nitric Oxide* **5**, 261-270.

**Yang X, Li Y, Ren B, Ding L, Gao C, Shen Q, Guo S.** 2012 Drought-induced root aerenchyma formation restricts water uptake in rice seedlings supplied with nitrate. *Plant Cell and Physiology* **53**, 495-504.

**Yu M, Lamattina L, Spoel SH, Loake GJ.** 2014. Nitric oxide function in plant biology: a redox cue in deconvolution. *New Phytologist* **202**, 1142-1156.

**Zemojtel T, Frohlich A, Palmieri MC, Kolanczyk M, Mikula I, Wyrwicz LS, Wanker EE, Mundlos S, Vingron M, Martasek P, et al.** 2006. Plant nitric oxide synthase: a never-ending story? *Trends in Plant Science* **11**, 524-525.

**Zhang AY, Jiang MY, Zhang JH, Ding HD, Xu SC, Hu XL, Tan MP.** 2007. Nitric oxide induced by hydrogen peroxide mediates abscisic acid-induced activation of the mitogen-activated protein kinase cascade involved in antioxidant defense in maize leaves. *New Phytologist* **175**, 36-50.

**Zhao MG, Tian QY, Zhang WH.** 2007. Nitric oxide synthase-dependent nitric oxide production is associated with salt tolerance in *Arabidopsis*. *Plant Physiology* **144**, 206-217.

**Zhao MG, Chen L, Zhang LL, Zhang WH.** 2009. Nitric reductase-dependent nitric

oxide production is involved in cold acclimation and freezing tolerance in Arabidopsis.  
*Plant Physiology* **151**,755-767.

## Figure legends

**Fig. 1.** Time-dependent endogenous nitric oxide (NO) production and histochemical detection of oxidative damage in the root apices of  $\text{NH}_4^+$ - and  $\text{NO}_3^-$ -supplied rice seedlings under water stress. (a) Detection of NO fluorescence using 4-amino-5-methylamino-2',7'-difluorofluorescein diacetate (DAF-FM DA) staining and a fluorescence microscope. NO generation is indicated by green fluorescence. Bar=300  $\mu\text{m}$ . (b) NO production is expressed as relative fluorescence. To detect the NO production time course, seedling roots exposed to 10% polyethylene glycol(PEG) were collected at 0, 3, 6, 12, 24, and 48 h. (c) and (d) Histochemical detection of the aldehydes derived from lipid peroxidation and Evans blue uptake in root apices of rice seedlings under water stress. Rice seedlings were either untreated or subjected to 3 or 24 h of water stress, respectively. Roots were stained with Schiff's reagent (c) and Evans blue (d), and then immediately photographed under a Leica S6E stereomicroscope (Leica, Solms, Germany). Red/purple indicates the presence of lipid peroxidation detected with Schiff's reagent. Bar=1 mm. Endogenous NO concentrations and histochemical detection of oxidative damage in the root are given. In Fig. 2b, the red dotted oval represents the high endogenous NO production in the  $\text{NH}_4^+$ - and  $\text{NO}_3^-$ -supplied rice, respectively. Values represent means $\pm$  standard error (SE) (n=10). CK indicates control treatment, i.e., plants receiving sufficient water.

**Fig. 2.** Responses of endogenous nitric oxide (NO) concentrations to water stress (a, b) and NO donor and NO scavenger (c, d) in root apices. (a) Photographs of NO production after sodium nitroprusside (SNP) application. Bar=300  $\mu\text{m}$ . (b) NO production expressed as relative fluorescence. Rice seedlings were either untreated or treated with SNP under water stress. After 3 h and 24 h of treatment, root tips were loaded with 10  $\mu\text{M}$  4-amino-5-methylamino-2',7'-difluorofluorescein diacetate (DAF-FM DA) and NO fluorescence was imaged after 20 min using a fluorescence microscope. Endogenous NO concentrations in root are displayed. Values represent means $\pm$  standard error (SE) (n=10). Different letters indicate significant differences at  $P<0.05$ . CK, control treatment, i.e., plants receiving sufficient water.

**Fig. 3.** Reactive oxygen species (ROS) and peroxynitrite ( $\text{ONOO}^-$ ) accumulation in root apices of rice seedlings treated with NO donor (sodium nitroprusside) and either receiving sufficient water (CK treatment) or subjected to water stress using polyethylene glycol(PEG). After 3 h,  $\text{O}_2^-$  (a),  $\text{H}_2\text{O}_2$  (b), and  $\text{OH}^-$  (c) levels in rice seedlings roots were measured by spectrophotometry. The accumulation of  $\text{ONOO}^-$  was detected with 10  $\mu\text{M}$  aminophenyl fluorescein. Fluorescence images and relative fluorescence intensity were analyzed as described in Fig. 2 for NO determination.

**Fig. 4.** Responses of oxidative damage in root apices of rice seedlings to NO donor (sodium nitroprusside) and NO scavenger (2-(4-carboxyphenyl)-4,4,5,5-tetramethylimidazole-1-oxyl-3-oxide; c-PTIO) in plants either receiving sufficient water (CK treatment) or subjected to water stress using polyethylene glycol (PEG). In the c-PTIO and PEG + c-PTIO treatments, the rice seedlings were pretreated with NO scavenger (c-PTIO) for 3 h followed by sufficient water or water stress. After 3 h, the malondialdehyde (MDA) content was determined. The MDA in rice roots represents lipid peroxidation (a) and carbonyl concentration (b). Values represent means  $\pm$  standard error (SE) (n=6). Different letters indicate significant differences at  $P < 0.05$  level.

**Fig. 5.** Effects of a nitrate reductase(NR) inhibitor (tungstate) and a nitric oxide (NO) synthase (NOS) inhibitor (Nx-nitro-L-arginine methyl ester hydrochloride; L-NAME) on NO content and oxidative damage in root apices of rice seedlings. Rice seedlings were pretreated with NR inhibitor (100  $\mu\text{M}$  tungstate) or NOS inhibitor (100  $\mu\text{M}$  L-NAME) for 3 h, and then subject to water treatment. (a) NO fluorescence. Bar = 300  $\mu\text{m}$ . (b) NO production expressed as relative fluorescence. (c, d) malondialdehyde (MDA) content representing lipid peroxidation (c) and carbonyl concentration (d) in rice seedling roots measured after 3 h of water treatment following tungstate or L-NAME pretreatment. Values represent means  $\pm$  standard error (SE) (n=6). Different letters indicate significant differences at  $P < 0.05$  level. CK, control treatment, i.e.,

plants receiving sufficient water.

**Fig. 6.** Effects of different treatments on antioxidant enzyme changes in rice seedlings under water stress. Roots were collected to assay catalase (CAT) (a), superoxide dismutase (SOD) (b), ascorbate peroxidase (APX) (c), and peroxidase (POD) (d) after 3 h of treatment with sufficient water (CK treatment) or water stress. For the 2-(4-carboxyphenyl)-4,4,5,5-tetramethylimidazoline-1-oxyl-3-oxide (c-PTIO), polyethylene glycol (PEG) + c-PTIO, and PEG + Nx-nitro-L-arginine methyl ester hydrochloride (L-NAME) treatments, the rice seedlings were pretreated with NO scavenger (c-PTIO) or NOS inhibitor (100  $\mu$ M L-NAME) for 3 h followed by sufficient water or water stress. Values represent means  $\pm$  standard error (SE) (n=6). Different letters indicate significant differences at  $P < 0.05$  level.

**Fig. 7.** Schematic illustration of a proposed model for the different responses of early NO production and its effects on the defense response of rice to water stress. In the roots of  $\text{NH}_4^+$ -supplied rice, the nitric oxide synthase (NOS)-mediated early nitric oxide (NO) burst (3h) significantly enhanced plant antioxidant defense by reducing reactive oxygen species (ROS) accumulation and enhancing antioxidant enzyme activity; the relative lower NO production after 24 h of water stress in comparison to  $\text{NO}_3^-$ -supplied rice, also helped maintaining the redox balance in root cells, thus enhancing their drought tolerance. In the roots of  $\text{NO}_3^-$ -supplied rice, ROS accumulation and oxidative damage induced by 3h of water stress were significantly higher than that in  $\text{NH}_4^+$ -supplied rice. High NO accumulation in the  $\text{NO}_3^-$ -treated roots likely caused the nitrosative stress at 24 h of water stress. A combined effect of oxidative and nitrification stresses might have led to the weak resistance to water stress in  $\text{NO}_3^-$ -supplied rice. NR, nitrate reductase. Red arrows represent increase, green arrows represent decrease. Black solid arrows represent defined pathways, dotted arrows represent undefined pathway.

### Legends to supplementary figures

**Fig. S1.** (a), (b), and (c) response of  $\text{NH}_4^+$ - and  $\text{NO}_3^-$ -supplied rice agronomic characteristics and biomass to water stress induced by 10% PEG after 21days of treatment. (d) Effects of water stress on leaf photosynthesis in  $\text{NH}_4^+$ - and  $\text{NO}_3^-$ -supplied rice after 21days of treatment. (e) Effects of water stress on root activity in  $\text{NH}_4^+$ - and  $\text{NO}_3^-$ -supplied rice after 21days of treatment. (f) Effects of water stress on root  $^{15}\text{N}$ -labeled uptake rate in  $\text{NH}_4^+$ - and  $\text{NO}_3^-$ -supplied rice after 21days of treatment. Rice leaf photosynthesis, root activity, and  $^{15}\text{N}$  uptake rate were determined according to Method S1. Values represent means $\pm$ SE (n=6). Different letters indicate significant differences at  $P<0.05$  level. CK, control treatment, i.e., plants receiving sufficient water.

**Fig. S2.** Effect of exogenous NO donor (SNP) on root oxidative damage under water stress. Rice roots were exposed to mixed N ( $\text{NH}_4^+$  +  $\text{NO}_3^-$ ) nutrient solution containing 0  $\mu\text{M}$ , 5  $\mu\text{M}$ , 10  $\mu\text{M}$ , 20  $\mu\text{M}$ , 40  $\mu\text{M}$ , 80  $\mu\text{M}$ , or 100  $\mu\text{M}$  SNP either with or without 10% PEG for 48 h. MDA levels representing lipid peroxidation (a) and carbonyl concentration (b) in rice seedling roots were determined. Values represent means $\pm$ SE (n=6). Different letters indicate significant differences at  $P<0.05$  level. CK, control treatment, i.e., plants receiving sufficient water.

**Fig. S3.** Effect of water stress on NR (a) and NOS (b) in root apices of rice seedlings. Roots were collected for the NR and NOS assays after 3 h and 24 h of water stress, respectively. Values represent means $\pm$ SE (n=6). Different letters indicate significant differences at  $P<0.05$  level. CK, control treatment, i.e., plants receiving sufficient water.

**Fig. S4.** Related compounds in NR-mediated and NOS-mediated NO pathways in root apices of rice seedlings treated with NR inhibitor (tungstate) and NOS inhibitor (L-NAME) under sufficient water or water stress treatment. (a) Levels of nitrate and nitrite in  $\text{NO}_3^-$ -treated roots. (b) Levels of arginine and citrulline in  $\text{NO}_3^-$ -treated roots.

(c) Levels of arginine and citrulline in  $\text{NH}_4^+$ -treated roots. For the PEG + Tungstate and PEG + L-NAME treatments, the rice seedlings were pretreated with NR inhibitor (100  $\mu\text{M}$  tungstate) or NOS inhibitor (100  $\mu\text{M}$  L-NAME) for 3 h, followed by sufficient water (CK treatment) or water stress treatment. Values represent means $\pm$ SE (n=6). Different letters indicate significant differences at  $P<0.05$  level.



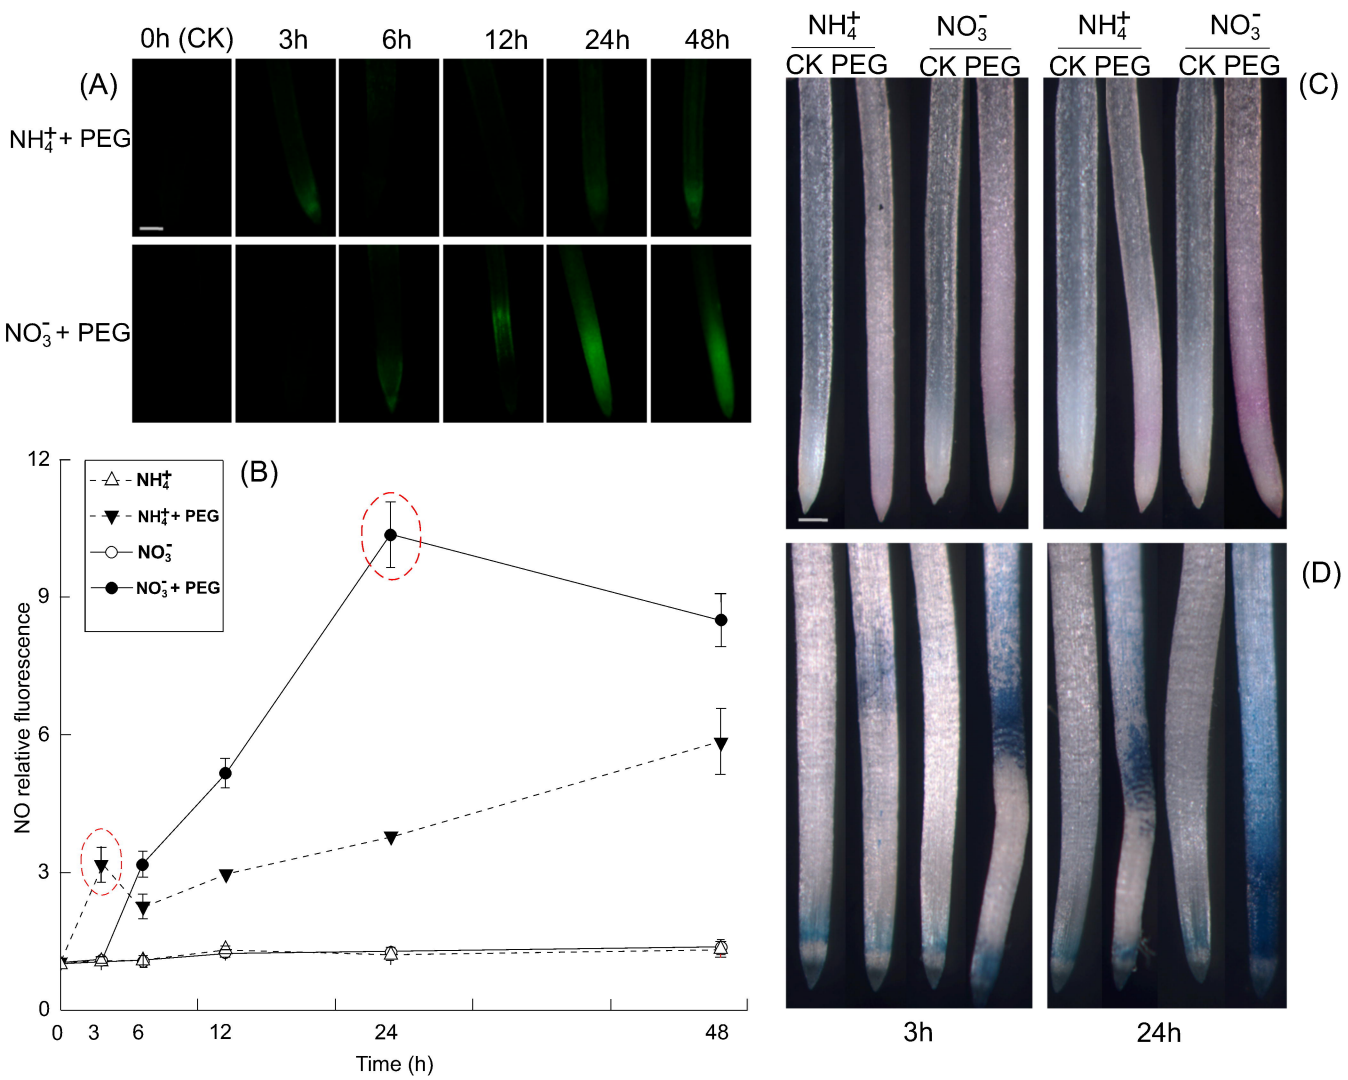

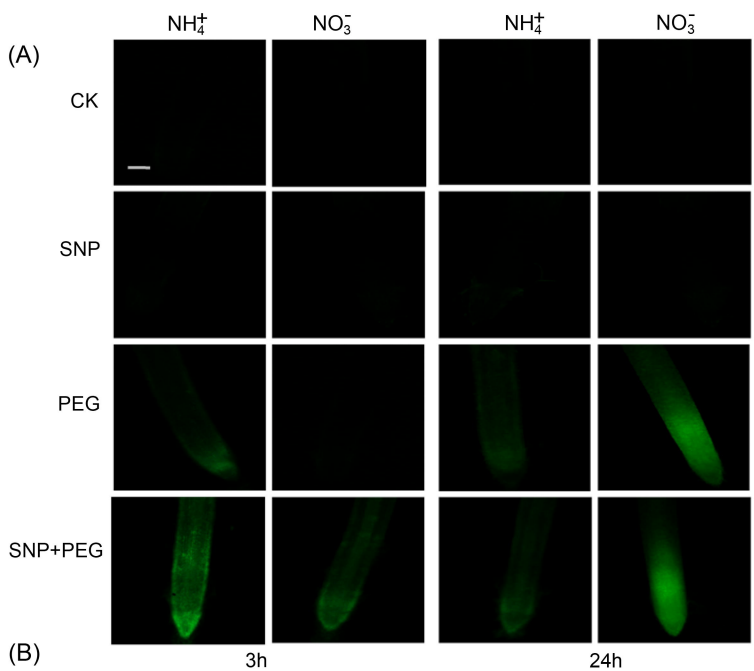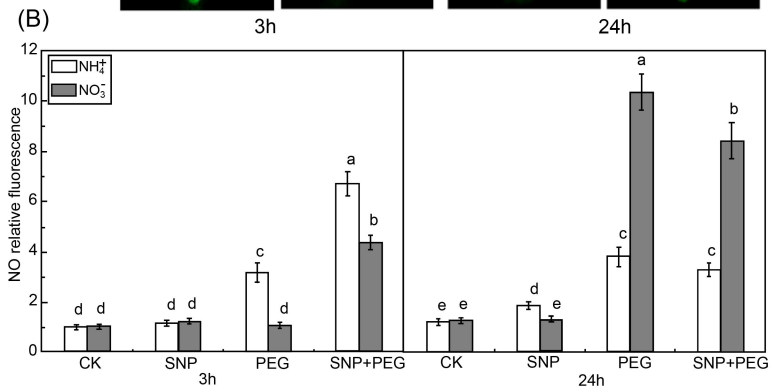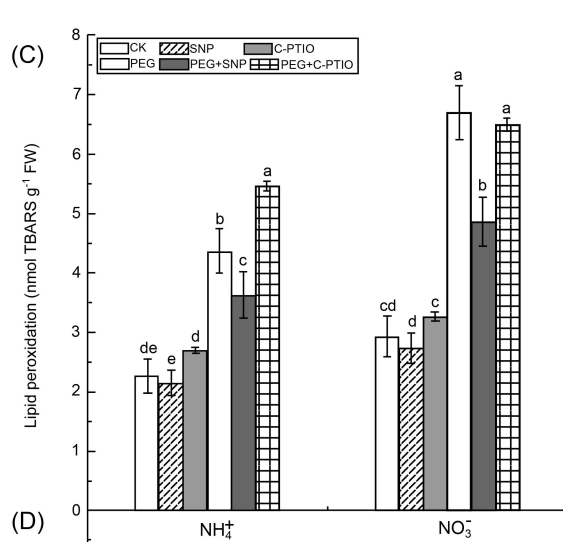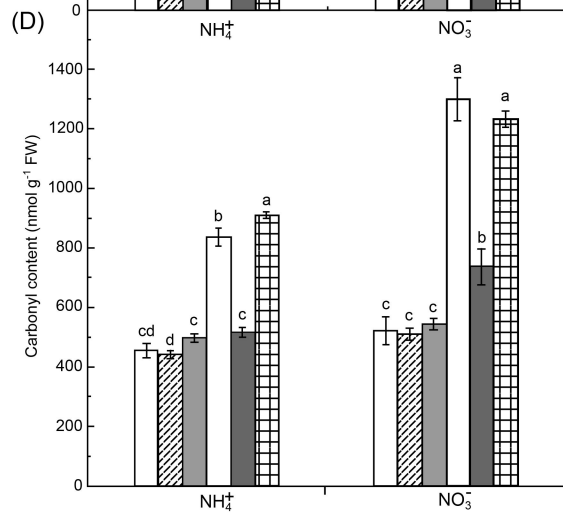

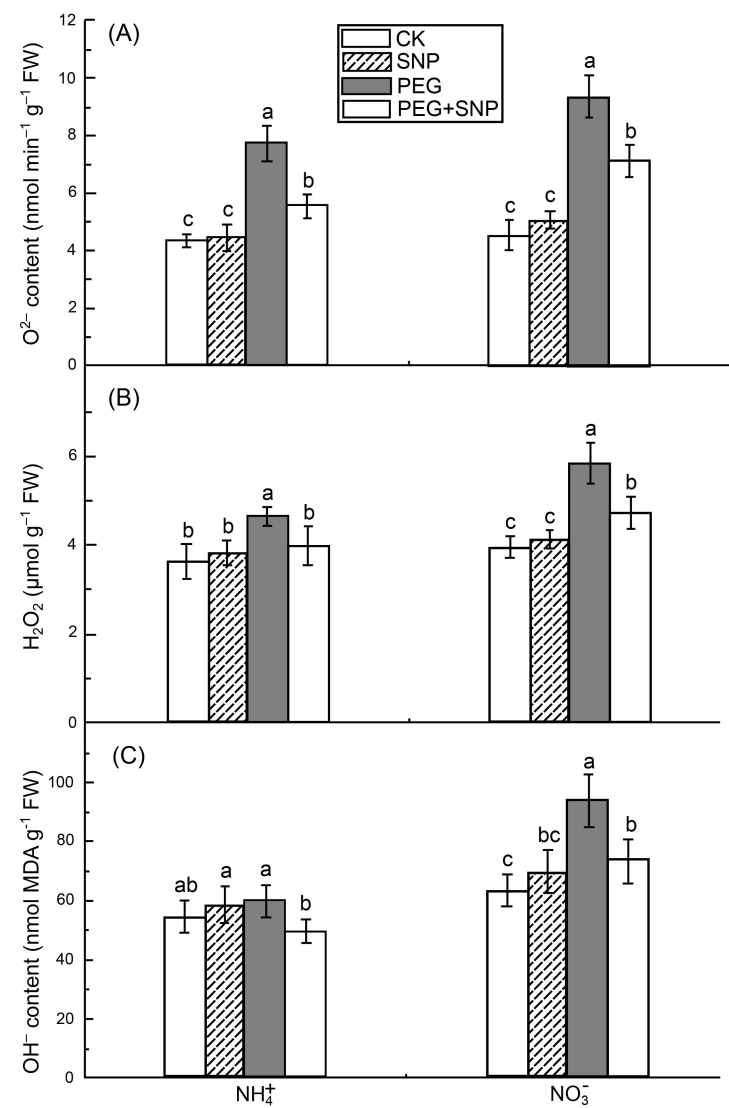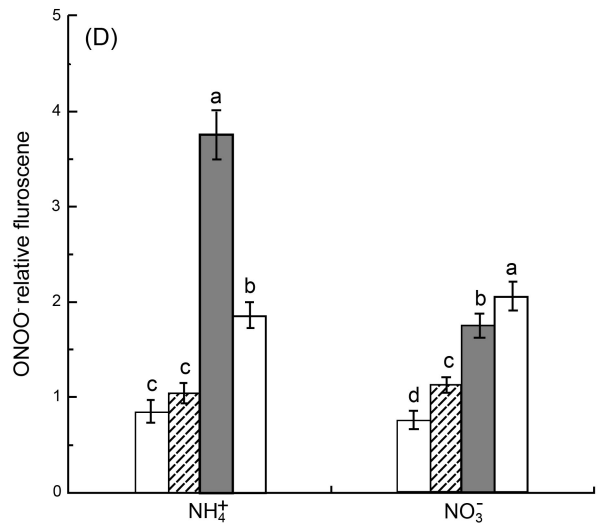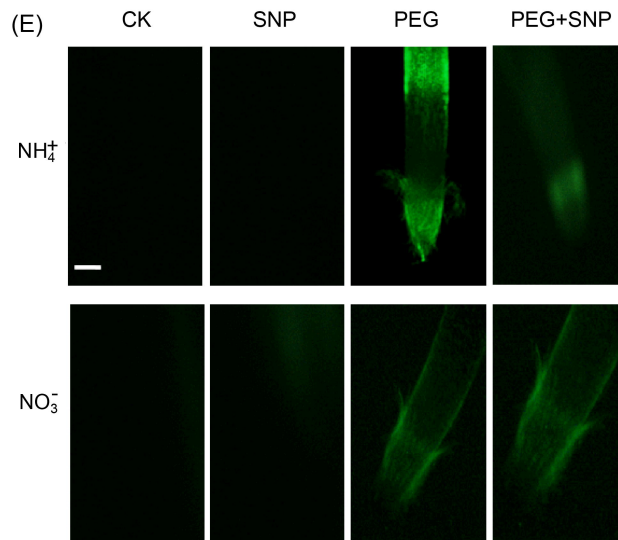

bioRxiv preprint doi: <https://doi.org/10.1101/383323>; this version posted August 2, 2018. The copyright holder for this preprint (which was not certified by peer review) is the author/funder, who has granted bioRxiv a license to display the preprint in perpetuity. It is made available under aCC-BY-NC 4.0 International license.

Lipid peroxidation (nmol TBARS g<sup>-1</sup> FW)

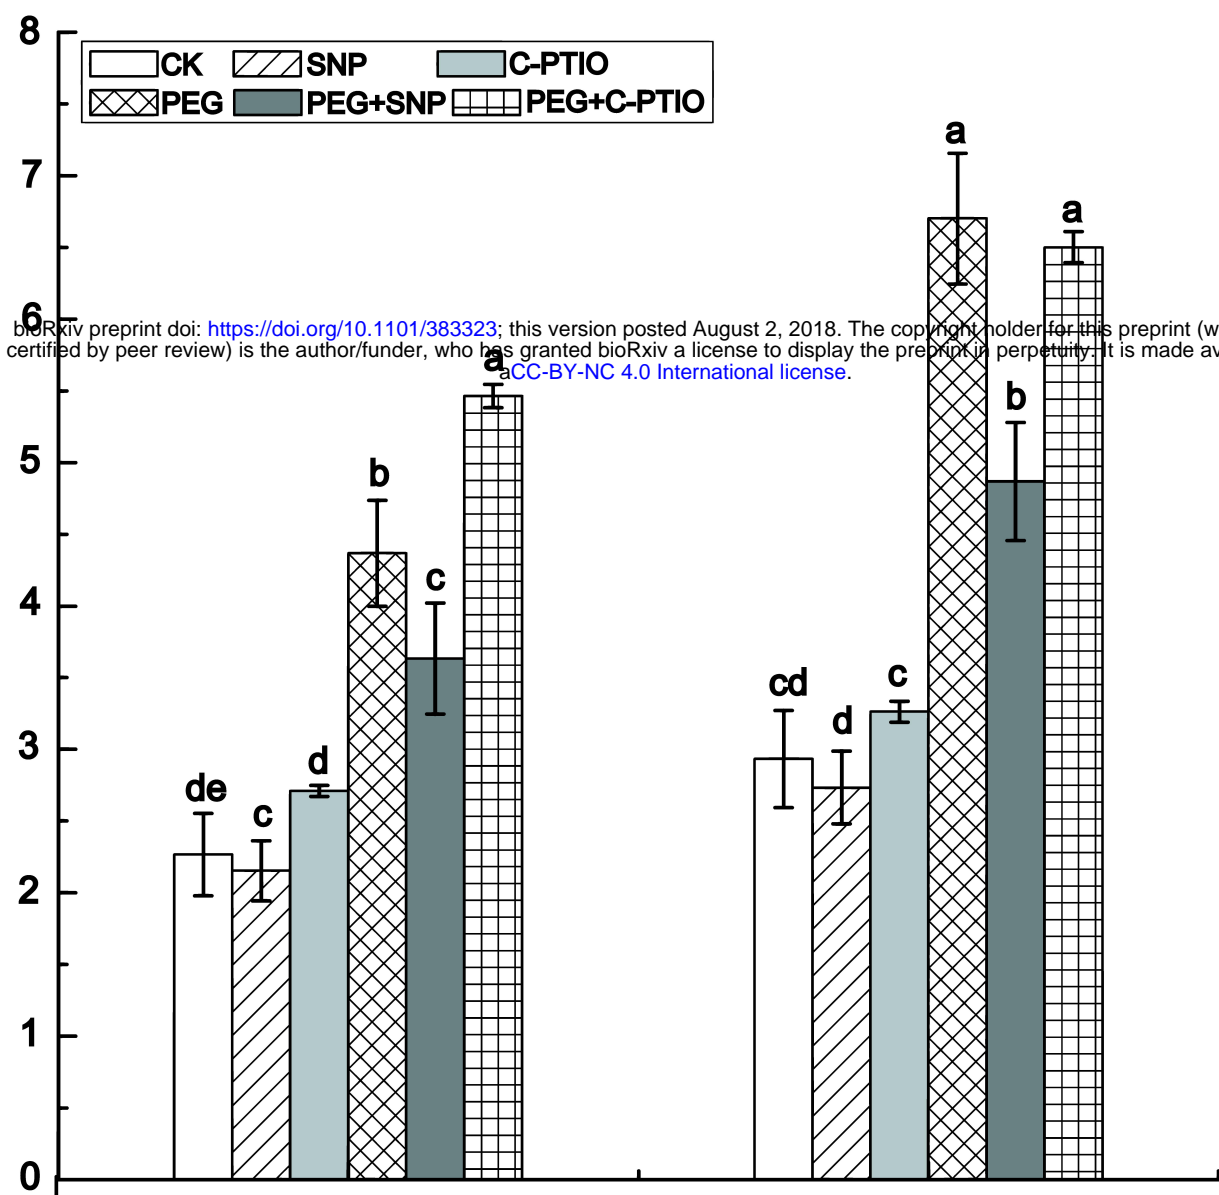

Carbonyl content (nmol g<sup>-1</sup> FW)

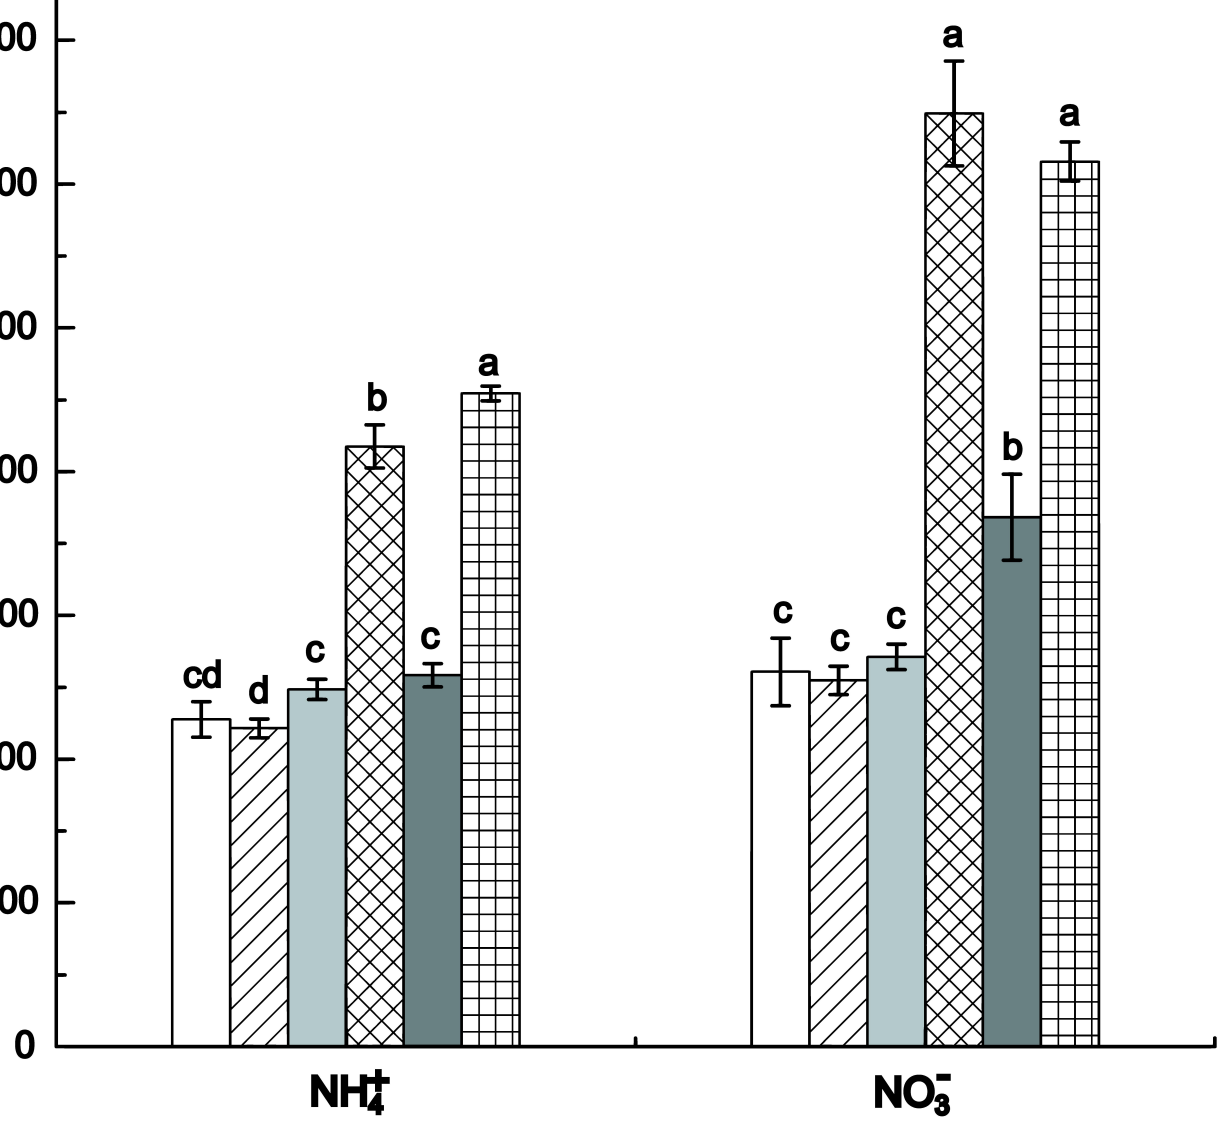

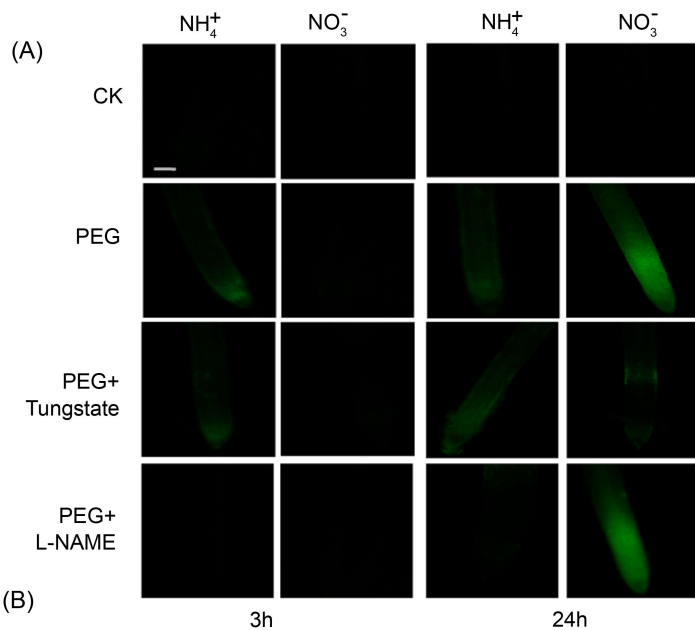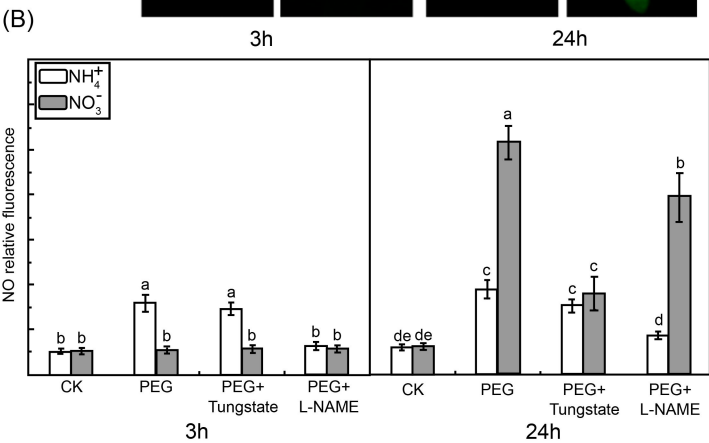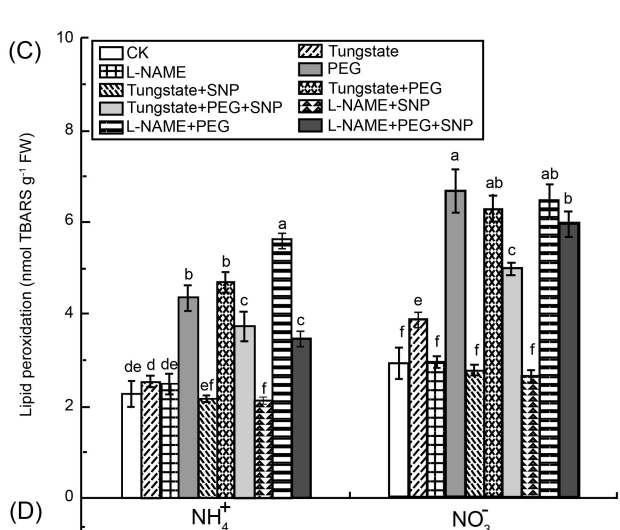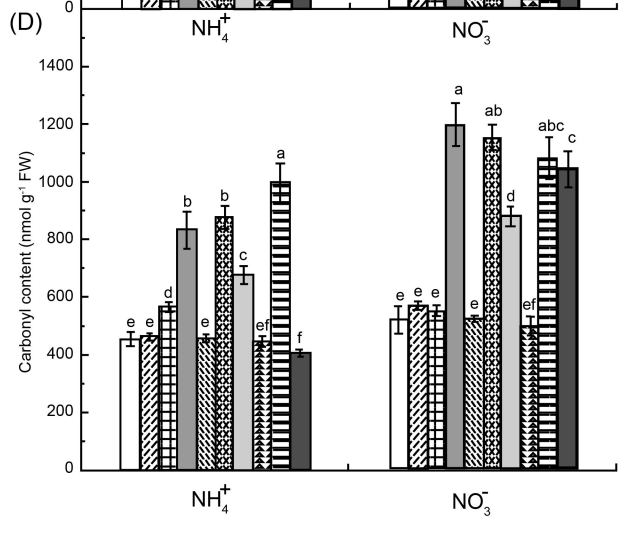

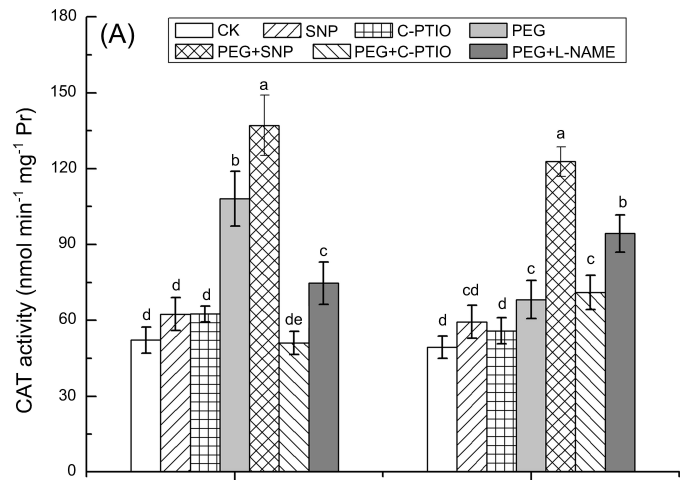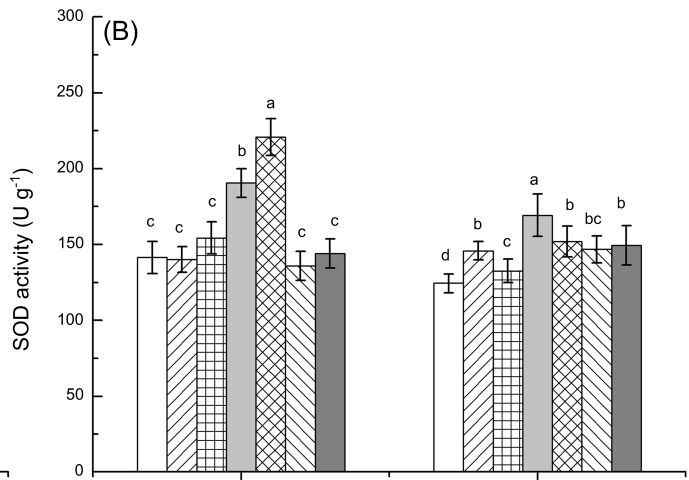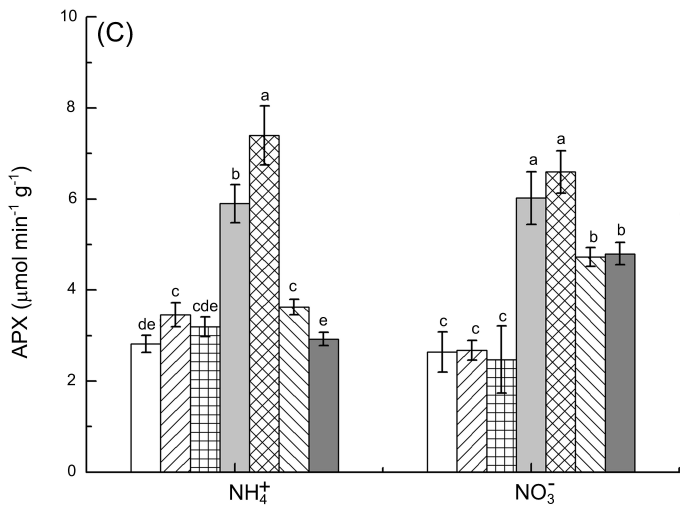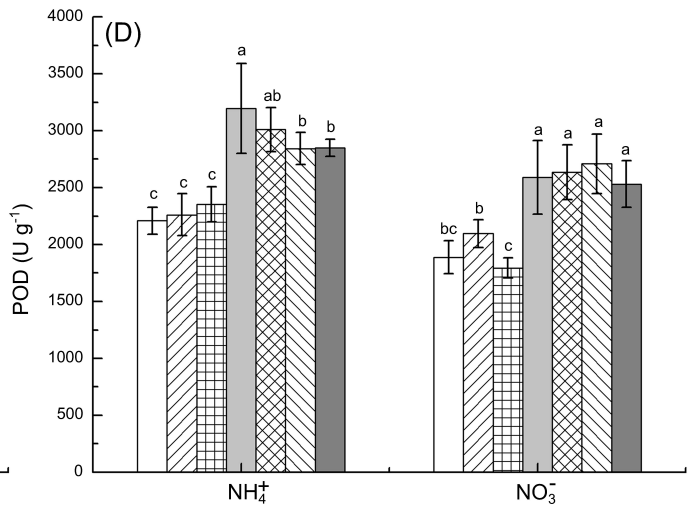

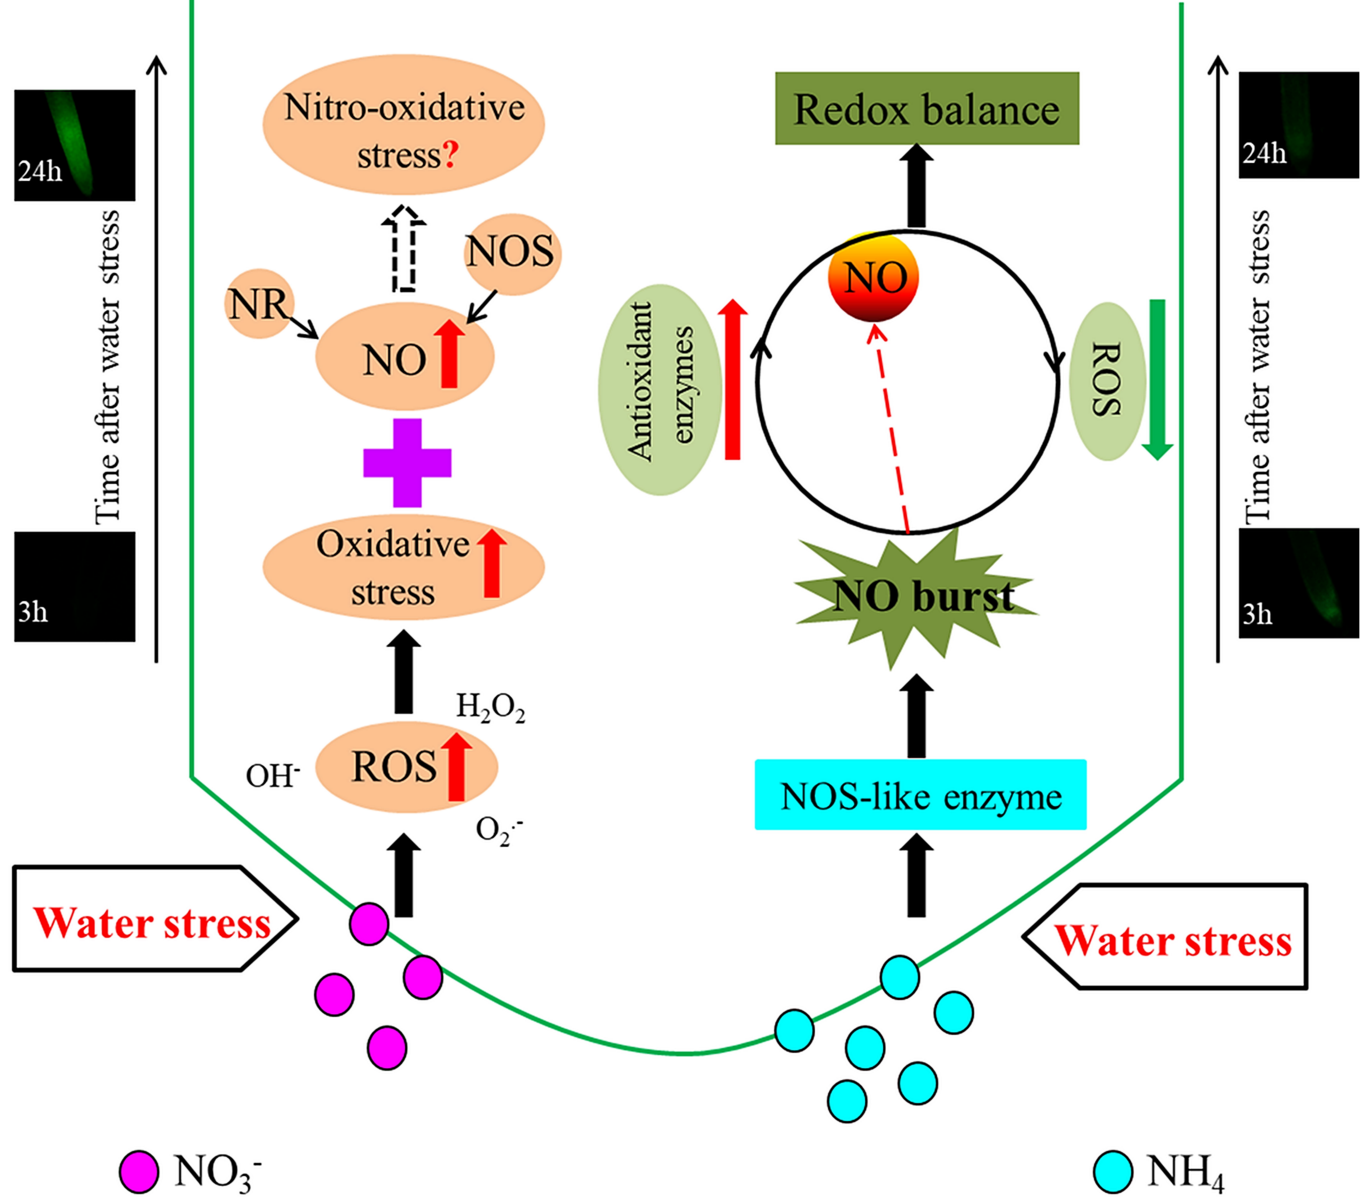

Source: https://www.biorxiv.org/content/10.1101/383323v1.full.pdf
